# Supplementary material for: Global Gene Responses of Resistant and Susceptible Sugarcane Cultivars to Acidovorax avenae subsp. avenae Identified Using Comparative Transcriptome Analysis
Source: MDPI journal article supplement (doi:10.3390/microorganisms8010010), 2019-12-19
Supplement: s1 [file s1]

**Table S1.** Primers used for qRT-PCR of the 12 randomly selected differentially expressed genes (DEGs).

| Gene ID              | Gene description (EC number) <sup>a</sup> | Forward primer (5'→3') | Reverse primer (5'→3') | T <sub>m</sub><br>(°C) <sup>b</sup> | Amplicon<br>size (bp) | Efficiency <sup>c</sup> |
|----------------------|-------------------------------------------|------------------------|------------------------|-------------------------------------|-----------------------|-------------------------|
| Cluster-13677.166560 | MEKK1P                                    | CCACGGAGGCCATGTTTCATC  | GCTTCCCAGAAGAGCACCAC   | 60                                  | 86                    | 0.99                    |
| Cluster-13677.90901  | PR1                                       | GACTGCCAGCTGGTTCACTC   | AACTGCTTCTCGGACACCCA   | 59                                  | 116                   | 0.92                    |
| Cluster-13677.341984 | 4CL                                       | GCGACGTCGTCCTTCTCCTC   | GGCGGTGTAGAGTGGGTTGG   | 62                                  | 110                   | 0.99                    |
| Cluster-13677.264040 | POD(EC1.11.1.7)                           | CGGTGAATACCACGGTGAAC   | ACAAACTGCTCGAAGAAGGC   | 56                                  | 181                   | 0.91                    |
| Cluster-13677.166670 | BGL32(EC3.2.1.21)                         | ATGGTTCATGCATCCGTTGG   | CCGGAATCCTTCTTCTCGGA   | 56                                  | 183                   | 0.96                    |
| Cluster-13677.452329 | SAUR                                      | CCGATTCTGCCATCGAGGTG   | TTTGTGGACACGACGGAAGC   | 58                                  | 145                   | 0.99                    |
| Cluster-13677.185631 | JAR1                                      | CAGAGCTCCGGTTCATCTGC   | AGCTTTGCTGCCTCCTCAAC   | 58                                  | 103                   | 0.94                    |
| Cluster-13677.108047 | CTR1                                      | AACCTTTCAATTGTGACTGA   | ATTGGAGGATTACGCTTATG   | 50                                  | 158                   | 0.99                    |
| Cluster-13677.366599 | TGA                                       | TAATTTACGGCTGCAAACAC   | CCAAAGAGAACTCAAAGCAC   | 52                                  | 121                   | 1.02                    |
| Cluster-13677.230082 | CPK                                       | ATCTGCGTGGGTTAGTTCAC   | ATCTGACTCAGGACCAGACC   | 56                                  | 200                   | 1.02                    |
| Cluster-13677.11606  | TPS14                                     | TGCATGACATGTCTCACCTG   | TCAGACTCAGGTGGTAAGGG   | 56                                  | 159                   | 0.97                    |
| Cluster-13677.187106 | PFP(EC2.7.1.90)                           | CACCAGGAATCAGATAACTC   | GAAGTTCCTTCCCTTGTATC   | 53                                  | 123                   | 0.98                    |
|                      | GAPDH (reference gene)                    | CACGGCCACTGGA AGCA     | TCCTCAGGGTTCCTGATGCC   | 58                                  | 101                   | 1.01                    |

<sup>a</sup> MEKK1P, mitogen-activated protein kinase kinase kinase 1, plant; PR1, pathogenesis-related protein 1; 4CL, 4-coumarate-CoA ligase; POD, peroxidase; BGL32, beta-glucosidase-32; SAUR, small auxin up RNA/SAUR-like auxin-responsive protein family; JAR1, jasmonic acid-amido synthetase; CTR1, serine/threonine-protein kinase CTR1; TGA, transcription factor TGA; CPK, calcium-dependent protein kinase; TPS14, S-linalool synthase; PFP, pyrophosphate--fructose-6-phosphate 1-phosphotransferase; GAPDH, glyceraldehyde-3-phosphate dehydrogenase. <sup>b</sup> T<sub>m</sub>, melting temperature of primers. <sup>c</sup> SYBR green based qRT-PCR efficiencies were calculated according to the standard curves of serial dilutions of total cDNA from the sugarcane leaf sample.
