# Supplementary material for: Global Gene Responses of Resistant and Susceptible Sugarcane Cultivars to Acidovorax avenae subsp. avenae Identified Using Comparative Transcriptome Analysis
Source: MDPI journal article supplement (doi:10.3390/microorganisms8010010), 2019-12-19
Supplement: s1 [file s1]

**Table S2.** Overview of RNA-sequencing reads derived from 24 libraries for *Aaa* (*Acidovorax avenae subsp. avenae*)- and mock-infected samples from resistant (ROC22) and susceptible (MT11-610) cultivars <sup>a</sup>

|                 | ROC22      |            |            |            | MT11-610   |            |            |            |
|-----------------|------------|------------|------------|------------|------------|------------|------------|------------|
| Description     | R0_CK      | R24_Aaa    | R48_Aaa    | R72_Aaa    | S0_CK      | S24_Aaa    | S48_Aaa    | S72_Aaa    |
| Raw reads       | 60,922,564 | 62,218,354 | 55,408,650 | 58,752,069 | 58,224,389 | 65,758,625 | 59,100,537 | 62,717,477 |
| Clean reads     | 59,959,395 | 61,259,067 | 54,282,803 | 57,434,943 | 57,284,497 | 64,485,665 | 57,875,395 | 61,269,024 |
| Total mapped    | 38,662,587 | 40,040,937 | 35,805,262 | 38,037,384 | 37,291,365 | 42,863,503 | 38,245,766 | 41,022,658 |
| Mapped (%)      | 65.1       | 65.5       | 66.4       | 66.7       | 65.4       | 66.5       | 66.3       | 67.3       |
| Clean bases (G) | 8.99       | 9.19       | 8.14       | 8.62       | 8.59       | 9.67       | 8.68       | 9.19       |
| Q30 (%)         | 92.5       | 92.3       | 92.9       | 92.6       | 91.0       | 92.4       | 92.7       | 93.0       |
| GC Content (%)  | 55.2       | 55.7       | 56.6       | 55.9       | 56.0       | 57.7       | 57.2       | 57.5       |

<sup>a</sup> The data from the average of three replicates in each treatment.
