# Supplementary material for: Global Gene Responses of Resistant and Susceptible Sugarcane Cultivars to Acidovorax avenae subsp. avenae Identified Using Comparative Transcriptome Analysis
Source: Microorganisms. 2019 Dec 19;8(1):10. doi: 10.3390/microorganisms8010010 (PMC7022508; doi:10.3390/microorganisms8010010)
Supplement: Supplementary file 1 [file microorganisms-08-00010-s001.zip]

Archive with 15 entries (15 files):
- Figure S1-20191213.pdf
- Figure S2-20191213.pdf
- Figure S3-20191213.pdf
- Figure S4-20191213.pdf
- Figure S5-20191213.pdf
- Figure S6-20191213.pdf
- Table S1-20191213.pdf
- Table S2-20191120.pdf
- Table S3-20191120.xlsx
- Table S4-20191120.xlsx
- Table S5-20191120.xlsx
- Table S6-20191212.xlsx
- Table S7-20191120.xlsx
- Table S8-20191120.xlsx
- Table S9-20191120.xlsx
