# Supplementary material for: Global Gene Responses of Resistant and Susceptible Sugarcane Cultivars to Acidovorax avenae subsp. avenae Identified Using Comparative Transcriptome Analysis
Source: Microorganisms. 2019 Dec 19;8(1):10. doi: 10.3390/microorganisms8010010 (PMC7022508; doi:10.3390/microorganisms8010010)
Supplement: Supplementary file 1 [file microorganisms-08-00010-s001.zip › Table S3-20191120.xlsx]

## Sheet: Sheet1
Table S3. Gene Ontology (GO) annotation of all unigenes identified in the two sugarcane cultivars, ROC22 and MT11-610.
GO Term (Leve 1)	GO Term (Level 2)	GO ID (Level 2)	Gene number	Percent (%)
Biological Process	cellular process	GO:0009987	113258	21.6859
Biological Process	metabolic process	GO:0008152	105498	20.2001
Biological Process	single-organism process	GO:0044699	84700	16.2178
Biological Process	biological regulation	GO:0065007	36847	7.05523
Biological Process	regulation of biological process	GO:0050789	33774	6.46683
Biological Process	response to stimulus	GO:0050896	32366	6.19724
Biological Process	localization	GO:0051179	27632	5.2908
Biological Process	cellular component organization or biogenesis	GO:0071840	20531	3.93115
Biological Process	multi-organism process	GO:0051704	13962	2.67336
Biological Process	signaling	GO:0023052	11993	2.29634
Biological Process	multicellular organismal process	GO:0032501	9763	1.86936
Biological Process	developmental process	GO:0032502	8494	1.62638
Biological Process	reproduction	GO:0000003	5635	1.07895
Biological Process	reproductive process	GO:0022414	5518	1.05655
Biological Process	negative regulation of biological process	GO:0048519	2943	0.563507
Biological Process	positive regulation of biological process	GO:0048518	2549	0.488066
Biological Process	immune system process	GO:0002376	2007	0.384288
Biological Process	locomotion	GO:0040011	1502	0.287593
Biological Process	growth	GO:0040007	1146	0.219429
Biological Process	biological adhesion	GO:0022610	967	0.185155
Biological Process	behavior	GO:0007610	342	0.065484
Biological Process	rhythmic process	GO:0048511	255	0.0488258
Biological Process	biological phase	GO:0044848	208	0.0398265
Biological Process	cell killing	GO:0001906	190	0.03638
Biological Process	detoxification	GO:0098754	180	0.0344653
Biological Process	cell aggregation	GO:0098743	5	0.000957368
Cellular Component	cell	GO:0005623	73583	21.6639
Cellular Component	cell part	GO:0044464	73385	21.6056
Cellular Component	organelle	GO:0043226	49916	14.696
Cellular Component	membrane	GO:0016020	35282	10.3875
Cellular Component	macromolecular complex	GO:0032991	34531	10.1664
Cellular Component	membrane part	GO:0044425	26984	7.94449
Cellular Component	organelle part	GO:0044422	23897	7.03563
Cellular Component	membrane-enclosed lumen	GO:0031974	5748	1.6923
Cellular Component	virion part	GO:0044423	4227	1.24449
Cellular Component	virion	GO:0019012	4227	1.24449
Cellular Component	extracellular region	GO:0005576	2411	0.709834
Cellular Component	other organism	GO:0044215	1718	0.505804
Cellular Component	other organism part	GO:0044217	1718	0.505804
Cellular Component	extracellular region part	GO:0044421	1157	0.340638
Cellular Component	extracellular matrix	GO:0031012	464	0.136608
Cellular Component	cell junction	GO:0030054	145	0.0426901
Cellular Component	nucleoid	GO:0009295	90	0.0264973
Cellular Component	extracellular matrix component	GO:0044420	54	0.0158984
Cellular Component	synapse	GO:0045202	52	0.0153096
Cellular Component	synapse part	GO:0044456	52	0.0153096
Cellular Component	symplast	GO:0055044	16	0.00471063
Molecular Function	binding	GO:0005488	114581	48.078
Molecular Function	catalytic activity	GO:0003824	90786	38.0937
Molecular Function	transporter activity	GO:0005215	11541	4.84259
Molecular Function	nucleic acid binding transcription factor activity	GO:0001071	6385	2.67914
Molecular Function	structural molecule activity	GO:0005198	4620	1.93855
Molecular Function	molecular function regulator	GO:0098772	4345	1.82316
Molecular Function	molecular transducer activity	GO:0060089	3238	1.35866
Molecular Function	transcription factor activity, protein binding	GO:0000988	1618	0.678911
Molecular Function	antioxidant activity	GO:0016209	1154	0.484217
Molecular Function	metallochaperone activity	GO:0016530	47	0.0197211
Molecular Function	translation regulator activity	GO:0045182	8	0.00335679
