# Supplementary material for: Global Gene Responses of Resistant and Susceptible Sugarcane Cultivars to Acidovorax avenae subsp. avenae Identified Using Comparative Transcriptome Analysis
Source: Microorganisms. 2019 Dec 19;8(1):10. doi: 10.3390/microorganisms8010010 (PMC7022508; doi:10.3390/microorganisms8010010)
Supplement: Supplementary file 1 [file microorganisms-08-00010-s001.zip › Table S4-20191120.xlsx]

## Sheet: Sheet1
Table S4. Kyoto Encyclopedia of Genes and Genomes (KEGG) annotation of all unigenes identified in the two sugarcane cultivars, ROC22 and MT11-610.
Pathway Hierarchy1	Pathway Hierarchy2	KEGG Pathway	Pathway ID	Gene Number
Cellular Processes	Transport and catabolism	Endocytosis	ko04144	1315
Cellular Processes	Transport and catabolism	Peroxisome	ko04146	1131
Cellular Processes	Transport and catabolism	Phagosome	ko04145	667
Cellular Processes	Transport and catabolism	Regulation of autophagy	ko04140	386
Environmental Information Processing	Membrane transport	ABC transporters	ko02010	343
Environmental Information Processing	Signal transduction	Phosphatidylinositol signaling system	ko04070	615
Environmental Information Processing	Signal transduction	Plant hormone signal transduction	ko04075	1540
Genetic Information Processing	Folding, sorting and degradation	Proteasome	ko03050	428
Genetic Information Processing	Folding, sorting and degradation	Protein export	ko03060	412
Genetic Information Processing	Folding, sorting and degradation	Protein processing in endoplasmic reticulum	ko04141	1632
Genetic Information Processing	Folding, sorting and degradation	RNA degradation	ko03018	1095
Genetic Information Processing	Folding, sorting and degradation	SNARE interactions in vesicular transport	ko04130	314
Genetic Information Processing	Folding, sorting and degradation	Sulfur relay system	ko04122	230
Genetic Information Processing	Folding, sorting and degradation	Ubiquitin mediated proteolysis	ko04120	1101
Genetic Information Processing	Replication and repair	Base excision repair	ko03410	412
Genetic Information Processing	Replication and repair	DNA replication	ko03030	723
Genetic Information Processing	Replication and repair	Homologous recombination	ko03440	620
Genetic Information Processing	Replication and repair	Mismatch repair	ko03430	489
Genetic Information Processing	Replication and repair	Non-homologous end-joining	ko03450	171
Genetic Information Processing	Replication and repair	Nucleotide excision repair	ko03420	742
Genetic Information Processing	Transcription	Basal transcription factors	ko03022	334
Genetic Information Processing	Transcription	RNA polymerase	ko03020	435
Genetic Information Processing	Transcription	Spliceosome	ko03040	1521
Genetic Information Processing	Translation	Aminoacyl-tRNA biosynthesis	ko00970	767
Genetic Information Processing	Translation	RNA transport	ko03013	1306
Genetic Information Processing	Translation	Ribosome	ko03010	1854
Genetic Information Processing	Translation	Ribosome biogenesis in eukaryotes	ko03008	946
Genetic Information Processing	Translation	mRNA surveillance pathway	ko03015	948
Metabolism	Amino acid metabolism	Alanine, aspartate and glutamate metabolism	ko00250	504
Metabolism	Amino acid metabolism	Arginine and proline metabolism	ko00330	479
Metabolism	Amino acid metabolism	Arginine biosynthesis	ko00220	293
Metabolism	Amino acid metabolism	Cysteine and methionine metabolism	ko00270	813
Metabolism	Amino acid metabolism	Glycine, serine and threonine metabolism	ko00260	684
Metabolism	Amino acid metabolism	Histidine metabolism	ko00340	147
Metabolism	Amino acid metabolism	Lysine biosynthesis	ko00300	135
Metabolism	Amino acid metabolism	Lysine degradation	ko00310	268
Metabolism	Amino acid metabolism	Phenylalanine metabolism	ko00360	490
Metabolism	Amino acid metabolism	Phenylalanine, tyrosine and tryptophan biosynthesis	ko00400	493
Metabolism	Amino acid metabolism	Tryptophan metabolism	ko00380	343
Metabolism	Amino acid metabolism	Tyrosine metabolism	ko00350	598
Metabolism	Amino acid metabolism	Valine, leucine and isoleucine biosynthesis	ko00290	149
Metabolism	Amino acid metabolism	Valine, leucine and isoleucine degradation	ko00280	401
Metabolism	Biosynthesis of other secondary metabolites	Anthocyanin biosynthesis	ko00942	17
Metabolism	Biosynthesis of other secondary metabolites	Benzoxazinoid biosynthesis	ko00402	11
Metabolism	Biosynthesis of other secondary metabolites	Betalain biosynthesis	ko00965	15
Metabolism	Biosynthesis of other secondary metabolites	Caffeine metabolism	ko00232	70
Metabolism	Biosynthesis of other secondary metabolites	Flavone and flavonol biosynthesis	ko00944	84
Metabolism	Biosynthesis of other secondary metabolites	Flavonoid biosynthesis	ko00941	418
Metabolism	Biosynthesis of other secondary metabolites	Glucosinolate biosynthesis	ko00966	60
Metabolism	Biosynthesis of other secondary metabolites	Indole alkaloid biosynthesis	ko00901	2
Metabolism	Biosynthesis of other secondary metabolites	Isoflavonoid biosynthesis	ko00943	1
Metabolism	Biosynthesis of other secondary metabolites	Isoquinoline alkaloid biosynthesis	ko00950	277
Metabolism	Biosynthesis of other secondary metabolites	Monobactam biosynthesis	ko00261	189
Metabolism	Biosynthesis of other secondary metabolites	Phenylpropanoid biosynthesis	ko00940	1613
Metabolism	Biosynthesis of other secondary metabolites	Stilbenoid, diarylheptanoid and gingerol biosynthesis	ko00945	292
Metabolism	Biosynthesis of other secondary metabolites	Tropane, piperidine and pyridine alkaloid biosynthesis	ko00960	369
Metabolism	Carbohydrate metabolism	Amino sugar and nucleotide sugar metabolism	ko00520	1151
Metabolism	Carbohydrate metabolism	Ascorbate and aldarate metabolism	ko00053	403
Metabolism	Carbohydrate metabolism	Butanoate metabolism	ko00650	194
Metabolism	Carbohydrate metabolism	C5-Branched dibasic acid metabolism	ko00660	46
Metabolism	Carbohydrate metabolism	Citrate cycle (TCA cycle)	ko00020	467
Metabolism	Carbohydrate metabolism	Fructose and mannose metabolism	ko00051	616
Metabolism	Carbohydrate metabolism	Galactose metabolism	ko00052	747
Metabolism	Carbohydrate metabolism	Glycolysis / Gluconeogenesis	ko00010	1301
Metabolism	Carbohydrate metabolism	Glyoxylate and dicarboxylate metabolism	ko00630	735
Metabolism	Carbohydrate metabolism	Inositol phosphate metabolism	ko00562	491
Metabolism	Carbohydrate metabolism	Pentose and glucuronate interconversions	ko00040	346
Metabolism	Carbohydrate metabolism	Pentose phosphate pathway	ko00030	528
Metabolism	Carbohydrate metabolism	Propanoate metabolism	ko00640	245
Metabolism	Carbohydrate metabolism	Pyruvate metabolism	ko00620	862
Metabolism	Carbohydrate metabolism	Starch and sucrose metabolism	ko00500	1766
Metabolism	Energy metabolism	Carbon fixation in photosynthetic organisms	ko00710	804
Metabolism	Energy metabolism	Nitrogen metabolism	ko00910	304
Metabolism	Energy metabolism	Oxidative phosphorylation	ko00190	888
Metabolism	Energy metabolism	Photosynthesis	ko00195	388
Metabolism	Energy metabolism	Photosynthesis - antenna proteins	ko00196	171
Metabolism	Energy metabolism	Sulfur metabolism	ko00920	330
Metabolism	Glycan biosynthesis and metabolism	Glycosaminoglycan degradation	ko00531	249
Metabolism	Glycan biosynthesis and metabolism	Glycosphingolipid biosynthesis - ganglio series	ko00604	72
Metabolism	Glycan biosynthesis and metabolism	Glycosphingolipid biosynthesis - globo series	ko00603	124
Metabolism	Glycan biosynthesis and metabolism	Glycosylphosphatidylinositol(GPI)-anchor biosynthesis	ko00563	351
Metabolism	Glycan biosynthesis and metabolism	N-Glycan biosynthesis	ko00510	407
Metabolism	Glycan biosynthesis and metabolism	Other glycan degradation	ko00511	249
Metabolism	Glycan biosynthesis and metabolism	Other types of O-glycan biosynthesis	ko00514	32
Metabolism	Lipid metabolism	Arachidonic acid metabolism	ko00590	129
Metabolism	Lipid metabolism	Biosynthesis of unsaturated fatty acids	ko01040	345
Metabolism	Lipid metabolism	Cutin, suberine and wax biosynthesis	ko00073	224
Metabolism	Lipid metabolism	Ether lipid metabolism	ko00565	276
Metabolism	Lipid metabolism	Fatty acid biosynthesis	ko00061	388
Metabolism	Lipid metabolism	Fatty acid degradation	ko00071	530
Metabolism	Lipid metabolism	Fatty acid elongation	ko00062	285
Metabolism	Lipid metabolism	Glycerolipid metabolism	ko00561	771
Metabolism	Lipid metabolism	Glycerophospholipid metabolism	ko00564	1148
Metabolism	Lipid metabolism	Linoleic acid metabolism	ko00591	177
Metabolism	Lipid metabolism	Sphingolipid metabolism	ko00600	491
Metabolism	Lipid metabolism	Steroid biosynthesis	ko00100	416
Metabolism	Lipid metabolism	Synthesis and degradation of ketone bodies	ko00072	54
Metabolism	Lipid metabolism	alpha-Linolenic acid metabolism	ko00592	494
Metabolism	Metabolism of cofactors and vitamins	Biotin metabolism	ko00780	217
Metabolism	Metabolism of cofactors and vitamins	Folate biosynthesis	ko00790	150
Metabolism	Metabolism of cofactors and vitamins	Lipoic acid metabolism	ko00785	49
Metabolism	Metabolism of cofactors and vitamins	Nicotinate and nicotinamide metabolism	ko00760	223
Metabolism	Metabolism of cofactors and vitamins	One carbon pool by folate	ko00670	150
Metabolism	Metabolism of cofactors and vitamins	Pantothenate and CoA biosynthesis	ko00770	266
Metabolism	Metabolism of cofactors and vitamins	Porphyrin and chlorophyll metabolism	ko00860	452
Metabolism	Metabolism of cofactors and vitamins	Riboflavin metabolism	ko00740	93
Metabolism	Metabolism of cofactors and vitamins	Thiamine metabolism	ko00730	117
Metabolism	Metabolism of cofactors and vitamins	Ubiquinone and other terpenoid-quinone biosynthesis	ko00130	515
Metabolism	Metabolism of cofactors and vitamins	Vitamin B6 metabolism	ko00750	71
Metabolism	Metabolism of other amino acids	Cyanoamino acid metabolism	ko00460	765
Metabolism	Metabolism of other amino acids	Glutathione metabolism	ko00480	1042
Metabolism	Metabolism of other amino acids	Selenocompound metabolism	ko00450	227
Metabolism	Metabolism of other amino acids	Taurine and hypotaurine metabolism	ko00430	128
Metabolism	Metabolism of other amino acids	beta-Alanine metabolism	ko00410	388
Metabolism	Metabolism of terpenoids and polyketides	Brassinosteroid biosynthesis	ko00905	133
Metabolism	Metabolism of terpenoids and polyketides	Carotenoid biosynthesis	ko00906	469
Metabolism	Metabolism of terpenoids and polyketides	Diterpenoid biosynthesis	ko00904	181
Metabolism	Metabolism of terpenoids and polyketides	Limonene and pinene degradation	ko00903	125
Metabolism	Metabolism of terpenoids and polyketides	Monoterpenoid biosynthesis	ko00902	202
Metabolism	Metabolism of terpenoids and polyketides	Sesquiterpenoid and triterpenoid biosynthesis	ko00909	216
Metabolism	Metabolism of terpenoids and polyketides	Terpenoid backbone biosynthesis	ko00900	736
Metabolism	Metabolism of terpenoids and polyketides	Zeatin biosynthesis	ko00908	239
Metabolism	Nucleotide metabolism	Purine metabolism	ko00230	1681
Metabolism	Nucleotide metabolism	Pyrimidine metabolism	ko00240	1387
Metabolism	Overview	2-Oxocarboxylic acid metabolism	ko01210	484
Metabolism	Overview	Biosynthesis of amino acids	ko01230	2276
Metabolism	Overview	Carbon metabolism	ko01200	2741
Metabolism	Overview	Degradation of aromatic compounds	ko01220	150
Metabolism	Overview	Fatty acid metabolism	ko01212	728
Organismal Systems	Environmental adaptation	Circadian rhythm - plant	ko04712	328
Organismal Systems	Environmental adaptation	Plant-pathogen interaction	ko04626	2795
