# Supplementary material for: Global Gene Responses of Resistant and Susceptible Sugarcane Cultivars to Acidovorax avenae subsp. avenae Identified Using Comparative Transcriptome Analysis
Source: Microorganisms. 2019 Dec 19;8(1):10. doi: 10.3390/microorganisms8010010 (PMC7022508; doi:10.3390/microorganisms8010010)
Supplement: Supplementary file 1 [file microorganisms-08-00010-s001.zip › Table S5-20191120.xlsx]

## Sheet: Sheet1
Table S5. Differentially expressed genes (DEGs) enriched in each KEGG pathway in resistant (ROC22) and susceptible (MT11-610) sugarcane cultivars.
Pathway ID	Pathway name	ROC22		MT11-610
		Upregulation	Downregulation	Upregulation	Downregulation
ko00196	Photosynthesis - antenna proteins	77	0	91	0
ko03010	Ribosome	134	0	0	0
ko00940	Phenylpropanoid biosynthesis	76	111	86	75
ko04075	Plant hormone signal transduction	73	80	0	0
ko00250	Alanine, aspartate and glutamate metabolism	61	0	29	25
ko00710	Carbon fixation in photosynthetic organisms	52	0	72	0
ko00270	Cysteine and methionine metabolism	51	0	52	0
ko00460	Cyanoamino acid metabolism	49	0	47	35
ko00620	Pyruvate metabolism	43	0	48	0
ko00860	Porphyrin and chlorophyll metabolism	42	0	36	0
ko00960	Tropane, piperidine and pyridine alkaloid biosynthesis	41	0	43	0
ko00260	Glycine, serine and threonine metabolism	41	0	0	0
ko00062	Fatty acid elongation	37	0	29	0
ko00100	Steroid biosynthesis	32	0	0	18
ko04712	Circadian rhythm - plant	29	0	48	0
ko00910	Nitrogen metabolism	26	0	40	0
ko00904	Diterpenoid biosynthesis	24	0	0	0
ko00909	Sesquiterpenoid and triterpenoid biosynthesis	22	0	0	11
ko04140	Regulation of autophagy	22	23	27	0
ko00261	Monobactam biosynthesis	20	0	14	0
ko00220	Arginine biosynthesis	19	0	20	0
ko00300	Lysine biosynthesis	15	0	0	0
ko00903	Limonene and pinene degradation	11	0	0	0
ko00905	Brassinosteroid biosynthesis	10	0	0	0
ko00750	Vitamin B6 metabolism	8	0	8	0
ko00232	Caffeine metabolism	4	0	0	0
ko00052	Galactose metabolism	0	0	67	0
ko00902	Monoterpenoid biosynthesis	0	0	25	0
ko00906	Carotenoid biosynthesis	0	31	34	0
ko00360	Phenylalanine metabolism	0	35	40	0
ko00500	Starch and sucrose metabolism	0	0	102	58
ko00051	Fructose and mannose metabolism	0	0	46	0
ko00520	Amino sugar and nucleotide sugar metabolism	0	72	68	0
ko00950	Isoquinoline alkaloid biosynthesis	0	0	22	13
ko00591	Linoleic acid metabolism	0	33	16	13
ko00966	Glucosinolate biosynthesis	0	0	4	0
ko00030	Pentose phosphate pathway	0	0	37	0
ko00480	Glutathione metabolism	0	0	58	0
ko01040	Biosynthesis of unsaturated fatty acids	0	0	21	0
ko00350	Tyrosine metabolism	0	0	34	0
ko00942	Anthocyanin biosynthesis	0	0	3	0
ko04141	Protein processing in endoplasmic reticulum	0	0	79	0
ko04626	Plant-pathogen interaction	0	145	0	0
ko00592	alpha-Linolenic acid metabolism	0	51	0	0
ko00410	beta-Alanine metabolism	0	50	0	40
ko00330	Arginine and proline metabolism	0	37	0	0
ko00941	Flavonoid biosynthesis	0	29	0	29
ko00280	Valine, leucine and isoleucine degradation	0	28	0	30
ko00195	Photosynthesis	0	25	0	0
ko00531	Glycosaminoglycan degradation	0	20	0	14
ko00944	Flavone and flavonol biosynthesis	0	15	0	15
ko00603	Glycosphingolipid biosynthesis - globo series	0	14	0	0
ko00740	Riboflavin metabolism	0	9	0	0
ko00402	Benzoxazinoid biosynthesis	0	5	0	0
ko00965	Betalain biosynthesis	0	4	0	3
ko00430	Taurine and hypotaurine metabolism	0	0	0	18
ko00650	Butanoate metabolism	0	0	0	21
ko00730	Thiamine metabolism	0	0	0	13
ko03430	Mismatch repair	0	0	0	28
ko04145	Phagosome	0	0	0	34
ko00640	Propanoate metabolism	0	0	0	20
ko03410	Base excision repair	0	0	0	22
ko03440	Homologous recombination	0	0	0	28
ko00072	Synthesis and degradation of ketone bodies	0	0	0	5
ko03450	Non-homologous end-joining	0	0	0	9
ko03008	Ribosome biogenesis in eukaryotes	0	0	0	33
ko03030	DNA replication	0	0	0	26
