# Supplementary material for: Global Gene Responses of Resistant and Susceptible Sugarcane Cultivars to Acidovorax avenae subsp. avenae Identified Using Comparative Transcriptome Analysis
Source: Microorganisms. 2019 Dec 19;8(1):10. doi: 10.3390/microorganisms8010010 (PMC7022508; doi:10.3390/microorganisms8010010)
Supplement: Supplementary file 1 [file microorganisms-08-00010-s001.zip › Table S6-20191212.xlsx]

## Sheet: Sheet1
Table S6. Transcript levels (log2Fold Change) determined by RNA sequencing for differentially expressed genes (DEGs) in ROC22 and MT11-610 enriched in three KEGG pathways: photosynthesis-antenna proteins (ko00196), carbon fixation in photosynthetic organisms (ko00710), and starch and sucrose metabolism (ko00500).
Ko ID	Ko name	Ko description	Unigene ID	ROC22			MT11-610
				24 hpi	48 hpi	72hpi	24 hpi	48 hpi	72hpi
Photosynthesis-antenna proteins (pathway ID: ko00196)
K08907	LHCA1	light-harvesting complex I chlorophyll a/b binding protein 1	Cluster-13677.297692	3.7714	4.3774	3.705	4.6038	5.2284	4.3924
			Cluster-13677.287564	3.628	4.2399	3.7777	4.9992	5.4099	4.8004
			Cluster-13677.206434	3.4002	3.8818	3.1066	4.5327	5.3257	4.5738
			Cluster-13677.331627	4.7548	5.496	4.6711	5.3394	5.2146	4.7852
			Cluster-13677.172778	3.217	3.1342	2.7558	4.5472	6.3246	5.248
			Cluster-13677.371161	2.2189	2.7821	2.8156	6.9392	7.689	7.2564
			Cluster-13677.212854	4.1819	4.8803	4.2769	5.8006	5.8652	5.5976
			Cluster-13677.212853	3.8078	4.4073	3.6316	5.1096	5.1212	4.7052
			Cluster-13677.212851	3.5008	3.7117	3.0128	5.7028	5.593	5.1179
			Cluster-13677.212850	3.1803	3.4356	2.792	5.0629	5.1168	4.5136
K08908	LHCA2	light-harvesting complex I chlorophyll a/b binding protein 2	Cluster-13677.214352	2.0497	3.1848	2.1014	3.7881	4.1742	3.9389
			Cluster-13677.214353	2.409	3.5584	2.6661	3.6268	4.0729	3.7364
			Cluster-13677.214354	1.7509	2.4923	1.6117	3.7821	4.1247	3.7398
			Cluster-13677.348100	2.4522	3.6947	2.7115	3.5913	4.0827	3.783
			Cluster-13677.260076	2.7928	3.7324	2.5877	4.4789	4.5399	4.1958
			Cluster-13677.240532	-2.0819	-2.6482	-3.988	-0.86532	-1.1114	-1.5791
			Cluster-13677.362187	1.8344	2.7225	1.9341	3.6983	4.1121	3.8457
			Cluster-13677.212323	2.3544	3.56	2.4673	3.737	4.0829	3.7181
			Cluster-13677.328926	2.5366	3.5826	2.277	3.7174	4.1642	3.6488
			Cluster-13677.240533	-1.7908	-2.2572	-3.2934	-0.36698	-0.83723	-1.2172
			Cluster-13677.240537	-0.86163	-0.77437	-2.0786	-0.66942	-1.0892	-1.4073
			Cluster-13677.240535	-1.0022	-1.5795	-2.0761	0.088161	-1.0124	-1.406
			Cluster-13677.240534	-0.17708	-0.51183	-1.9461	-0.69996	-0.84775	-1.3669
			Cluster-13677.402558	0.8041	1.433	1.523	3.8904	3.6714	3.8984
K08909	LHCA3	light-harvesting complex I chlorophyll a/b binding protein 3	Cluster-13677.223998	1.6528	2.0759	1.3964	3.3151	3.6495	3.0344
			Cluster-13677.223997	2.1824	2.6128	2.2094	4.1742	4.138	3.8599
			Cluster-13677.243856	2.1106	2.74	2.6212	3.6944	4.5296	4.1919
			Cluster-13677.193811	3.1984	3.2474	3.2729	2.8858	3.6199	3.6999
			Cluster-13677.253564	2.7117	3.0677	2.6157	4.1862	4.4731	4.2755
			Cluster-13677.224001	1.9829	2.407	1.8224	3.5093	3.7817	3.0543
			Cluster-13677.224003	3.361	4.4771	3.9003	4.6234	4.7722	4.565
			Cluster-13677.224002	2.4192	3.3803	2.4504	3.5754	3.7955	3.5015
			Cluster-13677.224005	1.9937	2.9192	2.3425	3.4961	4.0032	3.5883
			Cluster-13677.224008	1.7346	2.4403	1.7987	3.3789	3.5463	3.2428
K08910	LHCA4	light-harvesting complex I chlorophyll a/b binding protein 4	Cluster-13677.258321	4.4011	5.8635	3.7742	4.7094	4.645	4.9001
			Cluster-13677.258320	4.1429	4.9907	4.2053	5.3972	5.4036	4.7472
			Cluster-13677.260647	3.7809	4.3953	3.5069	6.4244	6.4485	5.8903
			Cluster-13677.260646	3.7973	4.5169	3.7066	5.728	5.7094	5.1513
			Cluster-13677.169222	3.1379	4.0979	3.2116	5.4628	5.0983	5.1871
			Cluster-13677.150938	3.6935	4.7512	4.0089	6.7894	7.0696	6.6421
K08912	LHCB1	light-harvesting complex II chlorophyll a/b binding protein 1	Cluster-13677.123160	6.9729	7.8003	6.404	8.2133	8.4013	7.9453
			Cluster-13677.123166	6.6056	7.196	5.613	8.0747	8.2334	7.8087
			Cluster-13677.123164	6.9358	7.3953	5.9666	7.919	7.7423	7.3745
			Cluster-13677.123168	5.495	5.6498	4.6875	7.2746	7.422	6.7523
			Cluster-13677.123169	2.7629	5.1281	1.7859	6.0461	6.6576	4.8777
			Cluster-13677.123180	7.959	8.9223	7.3454	8.9787	9.1632	8.5044
			Cluster-13677.123181	7.6139	8.2442	6.6572	7.9346	8.1641	7.8746
			Cluster-13677.123183	6.3	6.814	5.1449	7.6029	7.8418	7.0747
			Cluster-13677.123185	5.3612	5.085	4.6197	8.1589	8.7271	8.2953
			Cluster-13677.123175	8.7168	9.8048	7.948	9.4046	9.3871	8.9952
			Cluster-13677.123174	8.6337	9.4947	7.8067	8.3156	8.4734	7.8134
			Cluster-13677.123176	6.3157	6.8256	5.8139	8.2141	8.2423	7.592
			Cluster-13677.123171	6.1254	6.4418	5.5719	8.111	8.5045	7.4377
			Cluster-13677.123170	6.6779	7.0567	5.6827	7.8316	7.8249	7.2854
			Cluster-13677.123173	5.1688	6.2621	5.2932	8.9474	9.3769	8.8263
			Cluster-13677.123178	6.8915	7.4952	6.5745	8.6702	8.814	8.1997
			Cluster-13677.342205	6.0127	4.1811	4.8552	6.7259	7.0994	5.7928
K08913	LHCB2	light-harvesting complex II chlorophyll a/b binding protein 2	Cluster-13677.123167	6.7714	6.7658	5.8144	11.55	11.771	10.918
			Cluster-13677.92273	3.057	4.2816	0.56716	6.1898	6.4124	3.4776
			Cluster-13677.233294	6.2458	6.3672	6.2747	6.9708	8.7875	8.2175
			Cluster-13677.233295	5.578	7.0028	6.0101	5.1193	5.4642	4.8964
			Cluster-13677.233296	4.5996	5.2306	4.6954	6.5657	6.4909	6.0742
			Cluster-13677.233297	4.848	5.8671	5.2193	6.6579	6.9918	6.5061
			Cluster-13677.233290	7.2055	8.1567	7.7289	8.5152	8.3848	8.1626
			Cluster-13677.233291	4.7617	5.61	4.9365	6.414	6.3081	6.0433
			Cluster-13677.233289	5.8789	5.4921	6.3844	4.7835	5.8471	6.1206
			Cluster-13677.251587	4.5519	5.3795	4.6856	6.3603	6.3599	5.9156
			Cluster-13677.77738	4.6145	5.3555	4.8705	6.574	6.3928	6.1624
			Cluster-13677.230050	4.6047	5.3281	5.0348	6.4329	6.5941	5.922
			Cluster-13677.251581	3.2453	5.3864	3.4591	7.2284	7.367	7.128
			Cluster-13677.246225	5.0759	6.1055	5.728	7.2647	7.6128	7.0728
K08914	LHCB3	light-harvesting complex II chlorophyll a/b binding protein 3	Cluster-13677.80747	6.6172	6.7635	6.2148	8.8083	9.0216	8.3426
			Cluster-13677.80749	4.8838	5.3469	4.4802	9.2009	9.5919	8.7827
			Cluster-13677.80748	6.6095	6.8249	5.8293	8.1241	8.3762	7.5957
			Cluster-13677.80750	6.2251	6.8141	5.6294	8.8052	8.9243	8.3987
K08915	LHCB4	light-harvesting complex II chlorophyll a/b binding protein 4	Cluster-13677.285858	2.7384	3.5102	2.4768	3.7767	3.7011	3.4497
			Cluster-13677.114196	2.38	3.0889	1.815	3.4991	3.5275	3.3356
			Cluster-13677.235953	2.3672	3.0053	1.7285	3.3392	3.2219	2.9375
			Cluster-13677.383697	6.3065	5.2656	5.9382	6.5222	7.4609	7.7014
			Cluster-13677.78186	5.297	5.9928	4.9699	7.7786	7.8525	7.5062
			Cluster-13677.78187	6.8033	6.5363	6.8212	5.0877	5.7015	5.8137
			Cluster-13677.78184	7.0478	8.1561	7.1215	8.8004	8.8866	8.4259
			Cluster-13677.78185	5.472	6.195	5.0331	7.9693	7.9379	7.3546
			Cluster-13677.78183	5.8114	6.5726	6.1321	9.4921	9.6223	9.1687
			Cluster-13677.382895	4.2167	4.9793	4.6784	8.6276	8.8593	8.3024
K08917	LHCB6	light-harvesting complex II chlorophyll a/b binding protein 6	Cluster-13677.130875	2.5114	2.3451	1.3228	3.5412	3.8739	2.697
			Cluster-13677.280807	9.829	22.539	9.1806	3.4306	1.5317	3.9951
			Cluster-13677.280806	4.7139	5.3838	3.6847	4.09	4.0545	3.5842
			Cluster-13677.280805	2.6113	2.5581	1.3582	3.3496	3.689	2.4096
			Cluster-13677.277130	5.8449	6.3734	4.7342	4.2206	4.1161	3.7176
			Cluster-13677.330513	5.4838	6.1603	4.6188	4.4467	4.3979	4.0314
K14172	LHCB7	light-harvesting complex II chlorophyll a/b binding protein 7	Cluster-13677.193115	-0.27589	0.29644	1.1387	1.1406	1.7579	2.051
Carbon fixation in photosynthetic organisms (pathway ID: ko00710)
K01623	EC4.1.2.13，ALDO	fructose-bisphosphate aldolase, class I	Cluster-13677.222904	0.11923	0.79828	0.68182	1.9304	2.0308	1.9984
			Cluster-13677.222908	1.1142	1.8349	1.9187	2.0549	2.1401	2.2868
			Cluster-13677.222909	2.0163	1.4101	2.4672	1.8597	2.9212	2.7859
			Cluster-13677.225742	-1.7557	-0.49121	-1.1666	0.71936	1.2412	1.1498
			Cluster-13677.222910	0.53458	1.1044	1.234	1.9511	2.0556	2.0506
			Cluster-13677.260766	1.7271	2.5781	2.4993	2.1592	2.2176	2.3085
			Cluster-13677.222913	1.2671	0.86722	1.7966	2.2414	3.007	3.1189
			Cluster-13677.224883	-0.94204	-0.81199	-1.5293	0.60858	0.81586	0.69149
K00028	EC1.1.1.39	malate dehydrogenase (decarboxylating)	Cluster-13677.161997	-8.2242	-7.9421	-8.1748	3.1451	3.1279	3.4776
K00029	EC1.1.1.40, maeB	malate dehydrogenase (oxaloacetate-decarboxylating)(NADP+)	Cluster-13677.232675	0.4452	1.1959	0.24301	1.8089	1.8635	1.8421
			Cluster-13677.194086	1.1938	1.687	2.1293	2.5802	2.2625	2.5773
			Cluster-13677.194083	1.7458	2.2252	2.2829	2.4247	2.2779	2.5177
			Cluster-13677.194081	1.7994	1.5305	1.81	2.4955	3.2378	3.3011
			Cluster-13677.232659	1.6811	1.4821	3.1061	4.1314	4.8748	3.141
			Cluster-13677.194088	1.9325	2.3788	2.4138	2.3263	1.9618	2.9466
			Cluster-13677.186770	1.2006	1.5407	1.2092	1.6118	1.4559	2.1301
			Cluster-13677.251606	0.8552	1.1542	1.1287	2.3534	2.1564	2.1673
			Cluster-13677.232660	1.1316	2.0955	3.7353	4.2745	3.9122	2.7217
			Cluster-13677.244113	1.1157	1.78	1.6863	-1.7668	0.99273	-0.32782
			Cluster-13677.245806	1.3628	2.5505	2.596	0.11608	1.745	1.3942
			Cluster-13677.232676	1.019	1.1933	2.139	3.8192	4.2053	2.6956
			Cluster-13677.168327	1.0634	1.3507	1.9743	3.0278	3.3333	2.7089
			Cluster-13677.222972	1.3114	1.8105	1.7714	0.95648	1.0339	0.94068
			Cluster-13677.194077	1.644	1.6114	1.1947	1.8599	2.5806	3.0119
			Cluster-13677.233444	-0.40499	0.23438	0.86585	2.0935	3.006	2.0063
			Cluster-13677.172006	0.41554	1.6418	1.0375	1.6429	2.0431	2.6912
			Cluster-13677.187642	0.88319	0.61311	1.5725	1.753	2.6015	1.8194
			Cluster-13677.184080	-2.4042	-6.2066	-0.41436	7.3877	7.5635	5.5262
			Cluster-13677.186608	1.1897	0.65847	1.4116	2.4286	3.423	2.9007
			Cluster-13677.186607	0.038309	0.28736	1.3277	1.7678	2.3577	1.7179
			Cluster-13677.219927	1.575	1.851	1.5416	1.9543	1.6113	2.1963
			Cluster-13677.219928	1.075	1.7768	1.3354	1.7589	2.6682	3.2965
K00051	EC1.1.1.82	malate dehydrogenase (NADP+)	Cluster-13677.223058	-1.686	-1.2449	-2.8863	0.09807	-0.0044145	-0.84275
			Cluster-13677.230152	-1.0666	-0.78171	-1.6592	-0.24591	-0.72978	-0.75948
			Cluster-13677.229367	-0.81927	-0.17105	-1.987	0.2527	-0.049892	-0.6987
			Cluster-13677.230148	-1.5469	-1.3929	-2.1002	0.55909	0.14787	-0.71097
			Cluster-13677.228904	-1.8354	-1.4864	-2.9711	0.17479	-0.38088	-0.94562
			Cluster-13677.229359	-1.9977	-1.9821	-2.9143	-0.14892	-0.38082	-0.98231
			Cluster-13677.229357	-0.095572	-0.85771	-1.4648	0.21088	0.73397	-5.9201
K00615	EC2.2.1.1, tktA, tktB	transketolase	Cluster-13677.178739	-1.0837	-2.1279	-2.4651	-2.9191	-3.533	-3.6043
			Cluster-13677.116129	0.44488	-0.054771	-0.81233	-3.0853	-5.387	-3.2695
			Cluster-13677.189504	-0.23015	-1.2416	-1.7026	-2.9281	-3.3237	-3.6557
			Cluster-13677.127779	0.0078823	-1.6797	-0.90867	-2.8313	-4.1247	-3.8354
K01100	EC3.1.3.37	sedoheptulose-bisphosphatase	Cluster-13677.220486	-1.9765	-1.4745	-1.3134	0.053727	-0.18404	-0.87401
			Cluster-13677.221353	-1.3892	-1.1555	-1.9633	-0.36823	-0.38805	-0.62974
K01610	EC4.1.1.49, pckA	phosphoenolpyruvate carboxykinase (ATP)	Cluster-13677.266398	1.2153	1.3684	-0.12559	2.2526	1.7859	1.1257
			Cluster-13677.268075	2.5115	-6.8828	-7.1177	0.74135	-0.83095	-4.1506
			Cluster-13677.268076	5.6673	7.4291	4.8623	0.50086	1.3177	-4.0833
			Cluster-13677.268077	1.2505	1.2612	0.55636	2.2505	1.8677	1.1777
			Cluster-13677.268072	0.31907	0.35165	-1.0959	1.6135	1.4459	0.7659
			Cluster-13677.268066	1.3416	1.852	-0.22666	2.7559	1.9184	0.88165
			Cluster-13677.268063	1.2446	1.252	0.07251	1.8798	1.6268	0.8787
			Cluster-13677.268068	0.88725	1.0922	-0.55642	1.6786	1.3788	0.70822
			Cluster-13677.268070	-0.51374	-0.74027	-1.5244	1.5649	1.1978	0.65504
K03841	EC3.1.3.11，FBP, fbp	fructose-1,6-bisphosphatase I	Cluster-13677.150086	1.623	2.0141	1.5076	2.2888	1.7899	2.7524
			Cluster-13677.231941	-1.7702	-1.2655	-2.2758	-0.89881	-1.1701	-1.8482
			Cluster-13677.231948	-1.7378	-1.5079	-1.8246	-0.010085	-1.0672	-1.3762
			Cluster-13677.238334	-1.0801	-1.0866	-1.7422	-1.852	-0.38428	-1.7199
			Cluster-13677.238335	-1.4123	-1.4061	-2.2606	-0.63047	-0.61833	-1.0331
			Cluster-13677.150094	0.65533	1.2343	1.4063	1.9008	2.3754	2.3369
			Cluster-13677.150093	0.99615	0.13837	0.57503	1.9899	1.7173	2.1482
			Cluster-13677.150090	0.77982	1.0028	1.5407	2.2669	2.1158	2.5987
			Cluster-13677.150098	-0.53968	-1.2886	-3.7825	3.131	3.2176	3.3138
			Cluster-13677.150099	0.88574	0.52998	0.61942	1.8177	1.8445	1.9528
			Cluster-13677.310295	0.18587	0.1499	0.094449	1.5957	2.0767	1.8753
			Cluster-13677.150102	0.18452	-0.19995	-0.23716	1.7465	1.709	1.825
K05298	EC1.2.1.13，GAPA	glyceraldehyde-3-phosphate dehydrogenase (NADP+) (phosphorylating)	Cluster-13677.239638	0.43654	1.4468	1.6159	2.2151	2.6661	2.1299
			Cluster-13677.228132	-1.7519	-1.2821	-1.6974	0.6079	0.48136	0.35109
K00134	EC1.2.1.12，GAPDH, gapA	glyceraldehyde 3-phosphate dehydrogenase	Cluster-13677.288741	-0.52284	-1.887	-1.1629	-0.05677	-0.70738	-0.51186
			Cluster-13677.358952	3.8979	4.5298	4.7595	2.2049	1.7436	2.0345
			Cluster-13677.358950	1.68	1.1254	1.6948	2.6568	1.2485	1.7296
K14454	EC2.6.1.1，GOT1	aspartate aminotransferase, cytoplasmic	Cluster-13677.148222	-3.9409	0.63843	0.092328	4.2594	6.0446	NA
			Cluster-13677.148224	4.5873	4.5431	5.7793	-1.773	-0.79966	2.0084
			Cluster-13677.148217	1.3183	1.1125	1.6616	1.2196	1.6149	1.9859
			Cluster-13677.148218	-0.087309	1.4737	1.4228	1.656	2.0799	2.3547
K14455	EC2.6.1.1，GOT2	aspartate aminotransferase, mitochondrial	Cluster-13677.84072	1.72	1.5044	2.3717	1.5745	1.1523	0.62225
			Cluster-13677.84075	1.6641	1.3182	2.4587	0.43491	0.30959	0.37441
			Cluster-13677.84074	1.1754	1.1154	1.5042	0.50199	0.11081	0.44143
K00814	EC2.6.1.2，GPT, ALT	alanine transaminase	Cluster-13677.338323	2.5405	1.8996	2.4637	1.0561	0.094972	0.52649
			Cluster-13677.87078	5.8553	4.5788	6.6177	3.3096	3.3039	4.4185
			Cluster-13677.369186	4.8432	3.5762	5.1961	4.9893	4.0046	5.7997
			Cluster-13677.375302	4.4993	3.3642	4.9696	3.5866	2.9045	3.962
			Cluster-13677.369266	6.0126	4.4903	6.1844	3.131	2.8401	3.4847
			Cluster-13677.370632	3.1758	2.0085	4.4981	-0.027689	-2.8895	-0.66942
			Cluster-13677.372524	3.6557	2.528	4.8063	3.7574	3.2274	3.4085
K00025	EC1.1.1.37，MDH1	malate dehydrogenase	Cluster-13677.237542	-0.11161	-0.80527	-0.39002	-10.501	0.093578	-0.53704
K00026	EC1.1.1.37，MDH2	malate dehydrogenase	Cluster-13677.192775	1.6733	0.062653	1.8732	1.0477	0.13427	0.031939
			Cluster-13677.192751	2.2973	1.4182	1.4537	-7.1038	-4.0939	-4.5907
K00927	EC2.7.2.3，PGK, pgk	phosphoglycerate kinase	Cluster-13677.222130	-7.373	-1.0027	-0.14617	3.4188	2.299	-1.3153
			Cluster-13677.172183	-3.386	-5.7915	-2.5642	-4.7712	-1.9878	-2.4357
			Cluster-13677.243479	-0.82769	-0.82882	-1.7176	0.44678	0.24944	-0.2499
			Cluster-13677.287035	0.88105	0.97152	1.5342	0.12123	-0.38941	0.72788
K01595	EC4.1.1.31，PEPC	phosphoenolpyruvate carboxylase	Cluster-13677.172235	0.27987	0.23314	2.0752	-1.0697	-1.6086	-0.34041
			Cluster-13677.172237	-1.3103	-1.989	-0.36845	-0.55987	-1.0856	-1.0901
			Cluster-13677.172240	1.7274	0.63778	3.775	-2.6004	0.099211	-1.9333
			Cluster-13677.400552	-0.39935	-1.6643	-0.93321	0.69878	0.38309	-0.2851
			Cluster-13677.80878	-0.45541	-0.66402	-0.36172	-1.5607	-1.8161	-2.4448
			Cluster-13677.212659	-1.68	-0.47561	-0.24721	1.4823	1.4332	1.4756
			Cluster-13677.172243	0.18222	0.09975	1.557	-0.40821	-0.89441	-0.65883
			Cluster-13677.212201	0.9752	1.6168	3.7295	1.6813	2.9632	2.6573
			Cluster-13677.237763	-0.92994	-0.05542	0.59837	1.5637	1.7397	1.9129
			Cluster-13677.231882	0.74311	2.5202	2.4983	1.7164	2.1299	2.1173
			Cluster-13677.284965	-0.79434	1.3611	1.5615	2.1489	1.7253	2.254
			Cluster-13677.231937	0.21451	1.5756	1.58	1.6048	1.5349	1.6798
			Cluster-13677.259120	0.20442	1.5777	2.032	1.8141	1.7652	1.9307
			Cluster-13677.103755	1.8161	0.23205	1.1882	1.1358	0.81396	-0.23936
			Cluster-13677.103751	1.5153	1.1298	1.5705	1.1196	0.30026	0.5774
			Cluster-13677.168375	0.84181	1.2689	2.7502	-0.075611	-0.81468	-0.41881
			Cluster-13677.265075	0.47665	1.4131	3.1719	1.4989	2.5914	1.8465
K01006	EC2.7.9.1，ppdK	pyruvate, orthophosphate dikinase	Cluster-13677.244168	1.501	0.83336	-0.33799	1.8459	0.98287	1.0295
			Cluster-13677.244167	2.9091	3.1628	1.0489	2.0135	0.066805	1.0632
			Cluster-13677.244161	2.2178	1.9493	1.2851	3.1716	2.0889	2.4055
			Cluster-13677.213002	2.1118	2.3466	1.4914	2.8376	1.5307	1.9954
			Cluster-13677.230221	-13.339	-13.06	-13.295	2.6076	-4.0101	3.1268
			Cluster-13677.238808	-0.24461	1.3168	1.4569	3.0082	3.7432	2.3211
			Cluster-13677.230233	-0.53481	0.47885	0.41911	2.4129	1.8625	2.0576
			Cluster-13677.209389	-1.2561	-0.45108	1.0538	1.3969	2.1453	0.85856
			Cluster-13677.206074	-0.2289	1.1466	1.5227	1.763	1.945	0.78398
			Cluster-13677.229742	0.18467	0.96506	1.5704	2.4627	3.0222	0.7398
K00855	EC2.7.1.19，PRK, prkB	phosphoribulokinase	Cluster-13677.212414	-3.5881	-7.758	-4.5108	-5.4776	-0.98847	-1.6021
			Cluster-13677.212427	-1.9396	-2.6681	-1.6486	-1.4111	-1.1111	-1.0755
			Cluster-13677.237744	-2.4599	-4.1628	-4.7361	-0.92874	0.32981	-1.8712
K01602	EC4.1.1.39，rbcS	ribulose-bisphosphate carboxylase small chain	Cluster-13677.182735	-2.0011	-0.42646	-2.3854	0.48683	0.60736	0.44823
			Cluster-13677.182739	-1.9105	-0.54482	-2.7073	0.059066	-0.10262	-0.18761
			Cluster-13677.182737	-2.3308	-0.77826	-2.8951	-2.1359	-0.77934	-0.89553
			Cluster-13677.208754	-2.913	-1.4269	-2.4818	-0.52191	-0.54449	-0.59838
			Cluster-13677.208760	0.079805	-0.011572	0.97707	0.92917	2.5028	2.39
			Cluster-13677.208764	0.67071	0.33921	0.97121	0.88732	2.0794	1.7531
K01783	EC5.1.3.1，rpe, RPE	ribulose-phosphate 3-epimerase	Cluster-13677.216224	-2.035	-2.3029	-1.6717	0.29774	1.6722	-0.076925
			Cluster-13677.216227	1.2569	1.783	1.6148	1.0129	0.83319	0.9066
			Cluster-13677.254941	2.0847	2.0356	1.9573	1.482	1.4833	1.4284
			Cluster-13677.231867	2.6357	2.7416	2.4649	1.5094	1.2286	1.1585
K01807	EC5.3.1.6，rpiA	ribose 5-phosphate isomerase A	Cluster-13677.183919	-0.52712	-0.85587	-0.737	2.7763	3.1873	1.9993
K01803	EC5.3.1.1，TPI, tpiA	triosephosphate isomerase (TIM)	Cluster-13677.224108	-1.6416	-1.0613	-1.7739	0.26729	-0.17318	-0.32566
			Cluster-13677.224107	-1.9488	-0.98783	-1.8499	0.09056	0.19394	-0.23607
			Cluster-13677.278017	-1.5988	-0.55527	-1.1182	0.51751	0.2348	0.038021
			Cluster-13677.164719	1.6557	0.73812	1.2269	0.98725	0.14504	0.28394
			Cluster-13677.139263	1.7994	1.2219	1.2294	-0.024902	-1.2312	-1.5427
Starch and sucrose metabolism (pathway ID: ko00500)
K05350	EC3.2.1.21，bglB	beta-glucosidase	Cluster-13677.49762	-1.3865	-1.2748	-1.9185	-3.0739	-1.8806	-2.2066
			Cluster-13677.334910	-1.5578	-7.1879	-2.9099	1.4664	-3.6078	-3.7103
			Cluster-13677.404569	1.73	2.6073	2.9945	5.8827	6.2666	6.3122
			Cluster-13677.404575	4.0994	4.8129	3.9425	5.7388	5.7674	5.4998
			Cluster-13677.253480	-0.34309	-1.626	-2.0023	-6.9208	-0.4015	-0.858
			Cluster-13677.404570	2.1714	3.3814	1.7461	4.4421	4.2767	4.0622
			Cluster-13677.404573	1.0833	1.2791	1.3887	4.0667	4.3242	4.241
			Cluster-13677.160655	-2	-2.5937	-2.5044	-2.82	-1.6518	-0.77129
			Cluster-13677.185580	0.16524	-2.7748	-5.8968	-0.53436	-0.67517	-4.0322
			Cluster-13677.36627	1.9823	1.7119	1.9066	-6.351	-4.3167	-3.7403
			Cluster-13677.278093	1.3558	1.8564	0.90656	-0.23429	-0.3554	-0.20923
			Cluster-13677.185583	-0.68778	-2.4382	-2.3194	-1.9764	-1.8211	-2.449
			Cluster-13677.107012	-1.1976	-1.5568	-1.4322	-1.1864	-1.269	-1.3712
			Cluster-13677.185597	-0.055283	-1.6863	-1.6072	-1.8054	-1.4873	-1.9544
			Cluster-13677.185596	-1.4619	-2.6861	-2.068	-2.6827	-1.7999	-2.7343
			Cluster-13677.107009	-0.75421	-0.90509	-0.89301	-1.0143	-2.0574	-2.2363
			Cluster-13677.107008	-2.3257	-4.0938	-2.0658	-1.1345	-1.8217	-5.3099
			Cluster-13677.107000	-1.4265	-1.7607	-1.4608	-1.2907	-1.9191	-2.4329
			Cluster-13677.45491	2.7668	3.3411	2.2866	5.2179	5.0612	5.3063
			Cluster-13677.397843	2.2969	3.5193	3.5782	5.6407	5.766	5.4637
			Cluster-13677.404572	3.1827	3.9508	3.8558	5.6232	5.802	5.7872
			Cluster-13677.320381	-1.4851	-2.1659	-3.9253	-2.33	-2.0481	-3.5816
			Cluster-13677.404571	2.4003	3.7665	0.80812	7.1134	7.9669	6.999
K05349	bglX	beta-glucosidase	Cluster-13677.223752	-1.3404	-1.4957	-3.2975	-0.77007	-0.20761	-2.2617
			Cluster-13677.265220	2.3995	1.0568	1.3	1.3556	0.77028	1.125
			Cluster-13677.265234	2.3391	1.2044	1.0743	1.646	1.0537	0.85375
			Cluster-13677.184117	1.8269	0.35322	0.53349	1.5625	0.90546	0.99385
			Cluster-13677.189109	-2.3609	-1.0316	-8.0886	-7.4203	-2.8837	-3.1795
			Cluster-13677.282291	-2.4876	-1.3374	-1.4821	-1.5835	-2.8181	-3.938
			Cluster-13677.118292	-6.2896	-6.0117	-0.44246	-3.0537	-1.7526	-6.5517
K00688	EC2.4.1.1, glgP, PYG	starch phosphorylase	Cluster-13677.393861	-1.7225	-2.7536	-2.0023	-1.5339	-0.95007	-0.29488
			Cluster-13677.129149	-0.0518	-1.1357	-1.0092	-0.63396	-1.6543	-1.5931
K00695	EC2.4.1.13	sucrose synthase	Cluster-13677.277914	7.2428	5.9014	6.2064	1.9305	2.583	2.7904
			Cluster-13677.284124	1.3258	1.6716	1.8849	0.68958	0.92085	1.0603
			Cluster-13677.277920	1.6759	1.3527	0.8519	-0.42839	-0.57422	0.0051323
			Cluster-13677.277915	3.565	0.023485	1.8115	0.89535	1.0763	2.1255
K00696	EC2.4.1.14	sucrose-phosphate synthase	Cluster-13677.191974	-0.21214	0.36632	-0.34009	1.6901	1.8208	1.5685
			Cluster-13677.203982	0.28117	0.50999	-0.40148	2.6364	2.4317	2.167
			Cluster-13677.232404	-2.3932	-2.3898	-2.344	0.36387	1.6895	1.2141
K00703	EC2.4.1.21, glgA	starch synthase	Cluster-13677.369814	3.4809	3.8519	4.6133	0.51128	0.5488	1.4306
			Cluster-13677.90843	0.74497	1.4777	2.1003	0.23494	0.16249	0.17622
			Cluster-13677.90844	1.1538	2.851	2.5938	5.514	6.7778	6.5322
			Cluster-13677.90853	2.0364	2.9321	1.3369	4.5112	5.223	5.2704
			Cluster-13677.90850	3.0377	4.2898	3.7417	12.761	13.247	13.132
			Cluster-13677.90851	1.0642	1.8807	1.1896	9.7345	11.407	22.506
			Cluster-13677.90856	2.9483	2.9497	4.4956	10.15	23.415	10.42
			Cluster-13677.300572	1.175	1.707	1.0335	2.0306	2.374	2.4561
			Cluster-13677.300571	0.48376	1.0823	1.075	2.6555	2.9849	2.9647
K00847	EC2.7.1.4, scrK	fructokinase	Cluster-13677.164260	5.5582	5.3863	5.7679	6.4375	5.4171	4.529
			Cluster-13677.352311	-2.5474	-2.565	-1.4514	0.13042	-0.054014	-0.93551
			Cluster-13677.164261	2.3479	1.3098	1.4295	3.7273	4.0936	3.568
			Cluster-13677.133366	-1.8689	-1.4475	-1.8995	-8.4623	-2.7291	-1.3117
			Cluster-13677.164257	0.58251	0.8427	1.1799	2.5209	1.9846	2.4527
			Cluster-13677.164256	0.5966	0.80531	0.15245	3.8059	4.1092	4.3537
			Cluster-13677.164254	0.37131	0.18203	0.56623	2.2282	2.0459	2.1424
K01051	EC3.1.1.11	pectinesterase	Cluster-13677.399653	0.1362	-4.6195	-3.3277	-3.4814	-6.3769	-2.232
			Cluster-13677.153477	-1.224	-4.489	-5.6849	-4.9132	-6.0796	-8.0531
			Cluster-13677.153475	-1.0346	-5.2348	-3.9866	-6.5767	-5.5266	-6.4902
			Cluster-13677.391851	3.9991	1.6704	2.3003	3.1834	2.3008	3.5769
			Cluster-13677.391853	6.4357	3.5963	3.6497	7.7964	7.1973	5.9257
			Cluster-13677.391855	4.5202	2.8669	2.7819	2.1182	2.4811	4.1706
			Cluster-13677.391854	5.0638	3.1365	3.0645	1.8766	1.9195	3.4149
			Cluster-13677.134139	-1.3535	0.6095	-0.33324	-6.7477	-5.5789	-4.1724
			Cluster-13677.9026	5.0793	2.4903	0.80326	6.9858	6.4308	5.8743
			Cluster-13677.216490	6.2111	4.5535	4.3641	1.7025	1.9998	3.0237
K01176	EC3.2.1.1, amyA, malS	alpha-amylase	Cluster-13677.439253	2.563	0.75536	0.50961	4.7184	3.142	3.7609
			Cluster-13677.439254	3.4295	-0.083657	0.90609	4.9679	4.0966	4.2781
			Cluster-13677.439247	4.0334	2.2504	1.865	4.6951	2.5737	3.7077
			Cluster-13677.131597	-1.1014	-2.5669	-1.4616	-0.83826	-0.35115	-1.3008
K01184	EC3.2.1.15	polygalacturonase	Cluster-13677.313062	-0.26242	-0.30326	0.26942	1.4568	1.9082	1.7414
			Cluster-13677.285731	-2.9291	-2.6024	-2.1783	0.38832	-1.0986	-0.98783
			Cluster-13677.349276	-1.5645	-6.5655	-3.883	1.4693	3.1726	2.4254
K01177	EC3.2.1.2	beta-amylase	Cluster-13677.226411	-1.0499	-1.3146	-2.1584	-5.4388	-5.2518	-5.3539
			Cluster-13677.215617	1.0874	1.2713	1.4755	1.5919	1.7885	1.8998
			Cluster-13677.307779	0.79963	1.2854	1.1333	2.6173	3.8193	5.3015
			Cluster-13677.230338	0.25347	1.0244	-0.31531	1.835	1.775	0.59185
			Cluster-13677.168867	1.4259	1.6976	2.0049	2.9369	3.9063	5.418
			Cluster-13677.168864	1.6432	2.5215	2.4744	3.3762	4.9615	6.1461
			Cluster-13677.168862	1.5715	1.4454	1.861	4.0564	5.0859	7.8344
			Cluster-13677.168863	0.8575	1.4314	2.7738	3.6306	4.2965	6.5905
			Cluster-13677.71362	3.8171	2.3493	3.6827	2.8571	4.704	7.0615
			Cluster-13677.168868	1.329	1.9205	1.8079	2.52	3.8763	5.0422
			Cluster-13677.168866	0.11244	-0.0091856	0.46908	3.5001	4.6997	7.0484
			Cluster-13677.168870	0.18069	-0.051833	0.72581	2.3827	4.1361	5.3017
			Cluster-13677.168873	0.61768	1.1024	1.121	2.5926	3.9291	5.241
			Cluster-13677.168872	0.35128	0.71581	0.11823	3.6009	4.9045	6.4524
			Cluster-13677.241549	-0.004711	0.4203	-0.63677	1.6762	1.8001	0.46418
			Cluster-13677.240682	-2.5513	-0.36785	-0.60977	-0.58954	-1.1048	-1.2642
K01188	EC3.2.1.21	beta-glucosidase	Cluster-13677.171902	1.6099	1.0788	0.20558	-0.73761	-1.2037	0.49629
			Cluster-13677.166671	1.7268	2.2923	2.7887	-0.15199	1.0037	1.4795
			Cluster-13677.361577	0.78657	2.5998	1.3453	0.56147	0.93734	0.96217
			Cluster-13677.242911	-0.52583	2.1113	-0.63533	6.632	5.8444	7.171
			Cluster-26962.0	-4.337	-3.6022	-6.1865	-6.0006	-5.7919	-3.083
			Cluster-13677.343619	0.92068	-0.35362	2.6035	-2.4499	1.5126	1.2293
			Cluster-13677.221550	-1.1577	-1.9963	-1.297	-2.466	-1.7131	-2.1524
			Cluster-13677.314756	1.3015	1.0811	2.431	0.726	0.14567	0.66708
			Cluster-13677.291919	8.8846	7.6605	7.4568	1.909	2.4918	0.53393
			Cluster-13677.166657	0.99354	1.5865	2.0312	-0.33927	0.12164	0.8123
			Cluster-13677.141828	-0.47328	-1.1323	-1.5134	-1.7664	-0.20466	-2.6975
			Cluster-13677.141827	-2.2871	-3.5263	-2.9066	-1.4508	-0.64016	-2.0987
			Cluster-13677.27754	-0.68419	-0.49178	-4.6144	-5.0492	-8.7914	-8.9134
			Cluster-13677.27750	-2.6753	-3.3036	-4.3389	-5.4547	-8.2363	-8.3511
			Cluster-13677.166663	0.90914	1.4639	1.8523	-0.14813	0.18641	0.91804
			Cluster-13677.186095	6.2914	5.7784	6.0471	1.4814	1.9027	1.6394
			Cluster-13677.141813	-0.40395	-1.2385	-1.4919	-0.3466	-0.35243	-1.9407
			Cluster-13677.27746	-0.64458	-5.1196	-2.4719	-7.7787	-5.7053	-6.7281
			Cluster-13677.27747	0.58005	-2.695	-2.9191	-8.2577	-8.0581	-8.1696
			Cluster-13677.265229	-0.81358	-1.7116	-3.6735	-1.32	-2.9232	-2.8845
			Cluster-13677.27749	-2.8012	-5.0819	-5.3055	-5.1103	-8.0286	-8.1325
			Cluster-13677.26590	-3.7792	-2.5383	-3.7233	-7.0665	-6.871	-4.5262
			Cluster-13677.166670	1.9661	2.5981	2.7515	0.02527	0.38543	1.1953
			Cluster-13677.415699	-2.6227	-1.817	-2.7009	3.7949	2.2376	2.2729
			Cluster-18219.1	0.23754	-3.6475	-6.223	-8.0239	-6.8754	-7.939
			Cluster-13677.306009	6.0417	6.0318	5.7025	2.6462	1.153	2.8836
			Cluster-13677.18075	-0.20634	-0.88849	-1.1203	-4.9359	0.52251	-2.2011
			Cluster-13677.241579	-0.13	-0.63881	-1.3343	-2.266	-1.983	-1.9318
			Cluster-13677.238269	-11.374	-11.094	-7.9112	-0.91428	2.3862	-0.82521
			Cluster-13677.361588	0.75208	1.7956	1.2124	0.78501	1.7765	1.6333
			Cluster-13677.361584	0.65911	1.0205	1.0054	1.5806	1.4043	1.8379
			Cluster-13677.361585	-0.10433	0.65202	0.24315	1.5039	1.9212	1.9933
			Cluster-13677.238277	-3.7136	-4.3454	-3.0736	-2.5002	-0.96485	-0.42104
			Cluster-13677.238275	2.9713	1.5542	3.0459	-7.3491	-1.3696	-1.1375
			Cluster-13677.238273	-0.385	-2.0861	-0.90649	-1.9266	-0.77456	-1.8037
			Cluster-13677.242901	-0.67204	-0.53148	-2.4091	-1.3806	-1.7774	-3.1253
			Cluster-13677.361574	0.833	2.0693	1.4456	1.3972	1.6269	1.5091
			Cluster-13677.218109	0.2019	-1.2381	2.1117	1.3222	1.1509	1.1316
			Cluster-13677.166655	0.63877	1.0959	1.7827	-0.11602	0.10877	0.98515
			Cluster-13677.166653	0.61639	1.393	2.1652	-0.51525	0.37031	1.1586
			Cluster-13677.141824	-0.50844	-1.1426	-1.4216	-0.95931	-0.60125	-2.2292
			Cluster-13677.248040	-1.5306	-9.6296	-2.5831	-1.8171	-1.0778	-3.0643
			Cluster-13677.242899	-2.3213	-10.751	-2.487	-0.64517	-0.085219	-3.8591
K01193	EC3.2.1.26, sacA	beta-fructofuranosidase	Cluster-13677.324368	0.2855	0.078905	0.28436	2.6822	2.6184	3.1581
			Cluster-13677.340443	-0.22055	-0.42709	-1.2099	1.96	2.56	3.1402
			Cluster-13677.43480	0.56015	1.592	1.738	6.0308	6.899	7.0379
			Cluster-13677.340447	0.50057	-1.8126	-0.93322	1.1804	2.4229	2.362
			Cluster-13677.324367	0.68763	0.099336	0.64376	2.1875	2.0259	2.703
			Cluster-13677.340448	-0.78996	-0.88667	-1.2229	1.6108	2.1337	2.4207
			Cluster-13677.387239	3.5839	3.062	1.6579	3.4127	6.3127	2.709
			Cluster-13677.324362	-0.52994	-0.4973	-1.0859	2.7858	3.4247	2.211
			Cluster-13677.280901	-0.91224	-0.87338	-3.423	-0.062629	-0.27513	-0.54867
			Cluster-13677.324357	-0.42426	-1.6061	-0.7967	2.8271	3.148	2.4939
			Cluster-13677.324359	-1.5395	-0.0881	-0.43373	2.9614	3.4692	2.8473
K01179	EC3.2.1.4	endoglucanase	Cluster-13677.232563	-0.49181	-1.419	-1.2193	-2.059	-1.8045	-2.4269
			Cluster-13677.237586	-1.2277	-1.7832	-1.9221	-2.165	-2.2964	-2.0514
K08679	EC5.1.3.6	UDP-glucuronate 4-epimerase	Cluster-13677.361700	-1.0604	-6.9582	-2.2942	-0.046501	0.26407	-0.068775
			Cluster-13677.219870	-2.1659	-0.46499	-2.3884	-2.1507	0.38401	-4.0117
			Cluster-13677.243503	-2.367	-1.0785	-2.7614	0.83132	0.076348	-0.6066
			Cluster-13677.243507	-1.8616	-0.68965	-2.0967	0.88929	0.42989	-0.86766
			Cluster-13677.243505	-2.5451	-0.83547	-2.4781	0.4679	0.075212	-0.54444
K13648	EC2.4.1.43，GAUT	alpha-1,4-galacturonosyltransferase	Cluster-13677.322313	-2.2586	-1.1981	-2.2699	-2.5316	0.36451	-2.1521
			Cluster-13677.359659	-1.4693	-1.5243	-1.2383	-1.3296	-0.86611	-0.22926
			Cluster-13677.359658	-0.53511	-1.433	-1.7247	-0.95368	-0.24497	-0.34723
			Cluster-13677.131498	-1.1256	-0.66186	-1.1186	-6.4393	0.66628	-3.3938
			Cluster-13677.387628	0.14835	-2.1325	0.47052	-1.614	-0.83748	-5.3585
			Cluster-13677.374384	-0.017975	-1.277	-1.4877	-1.1123	-1.6848	-2.0972
			Cluster-13677.337177	0.051653	-0.72769	-1.0753	-0.60557	-1.3052	-2.4607
			Cluster-13677.358619	-0.092952	-0.35777	-0.44147	-0.60989	-1.1559	-1.8712
			Cluster-13677.99699	-1.8789	-2.5472	-2.5147	-1.8056	-1.8764	-2.22
K00700	EC2.4.1.18，glgB	1,4-alpha-glucan branching enzyme	Cluster-13677.68779	2.1306	1.1536	0.74564	0.65053	-7.2369	-7.3714
			Cluster-13677.251440	1.3334	1.9787	1.0913	-0.25381	-0.77213	-1.0373
			Cluster-13677.251434	2.0075	2.8004	1.9684	-0.05894	-0.7546	-0.97836
			Cluster-13677.141778	-0.033947	-0.52001	-0.58131	-1.6561	-1.5805	-1.8418
K00975	EC2.7.7.27，glgC	glucose-1-phosphate adenylyltransferase	Cluster-13677.284493	1.143	1.6321	1.2035	0.68027	0.63471	0.4588
			Cluster-13677.274168	-3.3891	-2.8763	-1.8013	-2.6301	-5.5858	-2.3383
			Cluster-13677.192175	2.2408	3.078	3.7472	3.5827	2.7942	3.2784
			Cluster-13677.174288	-0.51304	-2.0613	-1.4632	-0.19953	-0.62097	-1.4432
			Cluster-13677.192185	-0.50823	0.032374	0.40759	2.6847	1.6968	2.258
K01810	EC5.3.1.9，GPI, pgi	glucose-6-phosphate isomerase	Cluster-13677.225842	-2.7739	-2.6052	-3.3785	-0.38604	-0.61964	-1.2959
			Cluster-13677.225848	-2.8656	-2.0366	-1.6717	0.17798	-0.64793	-0.72773
			Cluster-13677.141543	1.1607	1.2024	1.5695	1.6229	1.717	2.0407
			Cluster-13677.197717	2.5212	3.8453	2.1131	1.5193	0.73193	0.82152
			Cluster-13677.259464	0.78684	2.0028	-0.46103	-0.53421	-1.1192	-0.19287
			Cluster-13677.225853	-0.76747	-7.1306	-7.357	0.20341	0.12328	-2.6137
			Cluster-13677.277067	1.2845	-0.083403	1.7798	1.9072	3.422	2.6274
			Cluster-13677.277066	0.95994	0.77665	1.1244	1.5702	1.667	2.2138
			Cluster-13677.277064	0.24479	-0.28593	0.16409	1.1978	1.5693	1.7167
			Cluster-13677.108422	0.98853	1.4675	1.7316	1.4283	1.6754	1.9931
K00844	EC2.7.1.1，HK	hexokinase	Cluster-13677.158279	0.68228	0.99864	1.4069	0.54473	2.4479	2.6656
			Cluster-13677.91912	0.4355	0.87633	-0.89053	1.8027	2.1147	1.5729
			Cluster-13677.91913	0.93599	0.40879	-1.3748	1.7183	2.1623	1.1555
			Cluster-13677.158280	0.71719	0.65236	1.7054	0.42908	2.3459	2.557
			Cluster-13677.235406	1.2739	2.2229	1.5991	0.66532	1.0534	0.96336
			Cluster-13677.158284	0.16338	0.34189	0.80816	0.22584	1.8998	1.9545
			Cluster-13677.158282	0.10969	0.40978	1.4312	0.27649	1.6898	2.1013
K01187	EC3.2.1.20，malZ	alpha-glucosidase	Cluster-13677.235425	-1.9246	-2.6605	-2.8171	-3.2923	-2.4682	-2.6718
			Cluster-13677.224871	-0.69556	-1.4734	-1.1558	-1.0483	-2.0677	-1.3479
			Cluster-13677.243690	-1.9519	-2.0751	-2.6816	-3.0492	-2.0021	-1.9752
			Cluster-13677.235014	-1.5607	-2.4057	-1.8817	-1.414	-2.1843	-1.8415
			Cluster-13677.247512	-1.5542	-2.2801	-2.1193	-0.88811	-1.3524	-1.1672
			Cluster-13677.256808	-1.0691	-1.2309	-1.6179	0.17276	0.16983	-0.18239
K18447	EC3.6.1.21，NUDX14	ADP-sugar diphosphatase	Cluster-13677.330466	1.2408	1.1455	1.0349	1.8586	1.7355	1.7365
			Cluster-13677.330470	4.2298	6.1528	5.4246	2.8244	4.4652	6.2672
K01087	EC3.1.3.12，otsB	trehalose 6-phosphate phosphatase	Cluster-13677.206685	-0.030231	1.1393	1.8122	0.010098	0.34663	1.415
			Cluster-13677.239420	-2.4761	0.65715	-2.4584	3.2233	1.459	0.29921
			Cluster-13677.239015	-7.7221	-2.8262	-4.0123	2.01	2.1105	-1.7114
			Cluster-13677.239013	-4.7449	-2.2228	-6.0445	3.2701	1.2845	-3.9006
			Cluster-13677.237812	-2.2703	0.74426	-2.6163	3.6844	0.81202	0.85253
			Cluster-13677.239009	-8.8319	-1.9252	-3.1689	2.7016	1.8109	-1.8003
			Cluster-13677.239006	-3.3334	-2.1913	-2.9351	-0.074801	0.26001	-0.42339
			Cluster-13677.239004	-4.066	-1.8287	-3.6547	2.4582	1.1531	-4.2825
			Cluster-13677.237820	-1.8642	-0.13117	0.45212	2.4114	5.0505	6.7173
			Cluster-13677.196481	0.51772	1.7897	2.4298	0.26585	0.14299	1.0844
			Cluster-13677.237819	0.1078	1.4393	1.8348	-0.64132	0.46377	0.97914
			Cluster-13677.237816	-0.87821	1.0281	-1.2188	2.6055	0.73974	-2.9193
			Cluster-13677.237810	-1.1714	1.2046	-1.4691	2.0383	0.68025	-3.0524
			Cluster-13677.237815	-2.4255	0.94683	-2.281	3.289	1.4406	-0.050869
K01835	EC5.4.2.2，pgm	phosphoglucomutase	Cluster-13677.300145	-1.854	-1.9751	-2.4577	0.89389	0.73182	-0.10295
K16055	EC2.4.1.15，TPS	trehalose 6-phosphate synthase/phosphatase	Cluster-13677.323270	0.23227	-0.2241	-1.9321	1.6845	1.6404	1.4954
			Cluster-13677.261942	2.2932	1.3012	-0.47145	2.8536	3.2891	1.6609
			Cluster-13677.30518	1.4938	1.6959	0.81412	1.5619	2.1903	2.639
			Cluster-13677.272190	2.2466	1.8732	0.2293	1.9101	2.1959	1.7744
			Cluster-13677.272191	1.6244	0.98635	-0.62369	4.1115	4.2935	3.3468
			Cluster-13677.272189	2.0026	1.1953	-0.40808	1.7731	1.8828	1.5911
			Cluster-13677.272188	1.9993	1.7704	0.58579	2.4139	2.4172	2.7293
			Cluster-13677.288449	2.0405	1.5748	-1.0718	2.6987	2.9869	2.6201
			Cluster-13677.242943	-1.848	-2.8612	-2.9602	1.0335	0.69406	-1.166
			Cluster-13677.30525	-0.45095	0.60928	-0.72026	1.9665	4.6609	4.8464
			Cluster-13677.30527	-1.4723	-1.2672	-3.0276	6.5735	8.7712	9.2005
			Cluster-13677.230031	0.046168	-0.5497	-3.8469	2.2015	2.6612	1.4119
			Cluster-13677.77902	1.5619	1.7118	0.84938	0.45791	0.81474	0.32121
			Cluster-13677.231894	1.1811	1.1724	-2.4394	2.149	2.5296	1.7159
			Cluster-13677.161825	1.6639	1.6385	0.70326	0.93017	0.19924	0.39804
			Cluster-13677.264814	1.3954	1.3642	-0.69217	1.0431	1.6341	1.0704
K00012	EC1.1.1.22，UGDH, ugd	UDPglucose 6-dehydrogenase	Cluster-13677.232278	-2.4456	-2.0432	-2.3192	-1.4291	-0.75031	-0.67172
			Cluster-13677.225347	-2.0907	-1.9292	-1.9211	-1.4358	-0.89071	-0.59759
K00963	EC2.7.7.9，UGP2, galU, galF	UTP--glucose-1-phosphate uridylyltransferase	Cluster-13677.257821	-0.67664	-1.2882	-0.0035992	4.2594	6.5845	5.4942
K08678	EC4.1.1.35，UXS1, uxs	UDP-glucuronate decarboxylase	Cluster-13677.224586	-1.7579	-2.0057	-2.3557	-0.66529	-0.70849	-0.64021
			Cluster-13677.224587	-1.6188	-2.1992	-2.7145	-0.39784	-0.73994	-0.88732
			Cluster-13677.193413	-1.4931	-1.0441	-1.0017	-0.9531	-0.64813	-7.5699
			Cluster-13677.224593	-1.5133	-1.7063	-1.4442	-1.1655	-0.64863	-0.30016
			Cluster-13677.224590	-1.8914	-1.7657	-2.5758	-0.97759	-0.94695	-1.3076
			Cluster-13677.128575	2.101	1.5558	1.7863	0.96014	1.3252	3.148
			Cluster-13677.271299	-1.5185	-1.7615	-1.4121	-1.3992	-0.88487	-0.49893
			Cluster-13677.222956	-1.3778	-2.4328	-2.1721	-0.46453	-0.86602	-0.51357
			Cluster-13677.224564	-1.4565	-0.91479	-1.6875	-0.080919	-0.34112	-1.0758
K15920	EC3.2.1.37，XYL4	beta-D-xylosidase 4	Cluster-13677.173754	-3.2519	-4.3557	-7.9219	-3.4938	-4.6917	-4.4745
			Cluster-13677.173755	-3.6728	-8.063	-8.2983	-3.0043	-4.4514	-4.976
			Cluster-13677.173753	-3.2839	-5.0579	-7.1394	-3.6474	-3.5233	-5.5228
			Cluster-13677.433288	-3.0864	-1.8509	-2.085	-6.2224	-5.1383	-7.0976
