# Supplementary material for: Global Gene Responses of Resistant and Susceptible Sugarcane Cultivars to Acidovorax avenae subsp. avenae Identified Using Comparative Transcriptome Analysis
Source: Microorganisms. 2019 Dec 19;8(1):10. doi: 10.3390/microorganisms8010010 (PMC7022508; doi:10.3390/microorganisms8010010)
Supplement: Supplementary file 1 [file microorganisms-08-00010-s001.zip › Table S7-20191120.xlsx]

## Sheet: Sheet1
Table S7. RNA sequencing results for transcript levels (log2Fold Change) of differentially expressed genes (DEGs) enriched in the KEGG phenylpropanoid biosynthesis pathway (ko00940).
Ko ID	Ko name	Ko description	Unigene ID	ROC22			MT11-610
				24 hpi	48 hpi	72hpi	24 hpi	48 hpi	72hpi
K01904	EC6.2.1.12,4CL	4-coumarate--CoA ligase	Cluster-13677.338959	0.26383	-2.8461	1.2826	1.392	1.2688	3.6915
		4-coumarate--CoA ligase	Cluster-13677.382006	-3.3743	-0.15208	-2.3657	-5.1693	0.32517	-1.1793
		4-coumarate--CoA ligase	Cluster-13677.123919	1.1743	-0.0059555	1.5715	1.6411	2.9827	3.8195
		4-coumarate--CoA ligase	Cluster-13677.224683	-0.8968	-1.8491	-1.8031	-0.89225	-0.23804	-0.55565
		4-coumarate--CoA ligase	Cluster-13677.224682	-0.91581	-1.5393	-1.3477	-1.1194	0.10857	-0.097845
		4-coumarate--CoA ligase	Cluster-13677.159230	2.9637	4.5565	3.6275	2.5434	1.8453	1.8348
		4-coumarate--CoA ligase	Cluster-13677.123921	1.6449	0.073282	2.7783	2.4626	4.4258	5.2107
		4-coumarate--CoA ligase	Cluster-13677.302231	-1.7666	-0.94951	-2.1358	-0.45971	0.81599	1.8346
		4-coumarate--CoA ligase	Cluster-13677.302230	-2.1168	-0.95915	-1.6845	2.4284	3.3385	3.8608
		4-coumarate--CoA ligase	Cluster-13677.341984	1.9431	2.8465	2.2183	-0.52426	0.56453	-0.25684
		4-coumarate--CoA ligase	Cluster-13677.123920	0.52346	-0.25494	1.4494	1.4591	2.6011	3.6412
		4-coumarate--CoA ligase	Cluster-13677.215696	-1.4744	-1.3792	-1.6712	0.70382	1.3703	-0.37918
K05350	EC3.2.1.21,bglB	beta-glucosidase	Cluster-13677.404569	1.73	2.6073	2.9945	5.8827	6.2666	6.3122
		beta-glucosidase	Cluster-13677.334910	-1.5578	-7.1879	-2.9099	1.4664	-3.6078	-3.7103
		beta-glucosidase	Cluster-13677.404575	4.0994	4.8129	3.9425	5.7388	5.7674	5.4998
		beta-glucosidase	Cluster-13677.253480	-0.34309	-1.626	-2.0023	-6.9208	-0.4015	-0.858
		beta-glucosidase	Cluster-13677.404571	2.4003	3.7665	0.80812	7.1134	7.9669	6.999
		beta-glucosidase	Cluster-13677.404570	2.1714	3.3814	1.7461	4.4421	4.2767	4.0622
		beta-glucosidase	Cluster-13677.404573	1.0833	1.2791	1.3887	4.0667	4.3242	4.241
		beta-glucosidase	Cluster-13677.404572	3.1827	3.9508	3.8558	5.6232	5.802	5.7872
		beta-glucosidase	Cluster-13677.160655	-2	-2.5937	-2.5044	-2.82	-1.6518	-0.77129
		beta-glucosidase	Cluster-13677.185580	0.16524	-2.7748	-5.8968	-0.53436	-0.67517	-4.0322
		beta-glucosidase	Cluster-13677.278093	1.3558	1.8564	0.90656	-0.23429	-0.3554	-0.20923
		beta-glucosidase	Cluster-13677.185583	-0.68778	-2.4382	-2.3194	-1.9764	-1.8211	-2.449
		beta-glucosidase	Cluster-13677.36627	1.9823	1.7119	1.9066	-6.351	-4.3167	-3.7403
		beta-glucosidase	Cluster-13677.185597	-0.055283	-1.6863	-1.6072	-1.8054	-1.4873	-1.9544
		beta-glucosidase	Cluster-13677.185596	-1.4619	-2.6861	-2.068	-2.6827	-1.7999	-2.7343
		beta-glucosidase	Cluster-13677.107012	-1.1976	-1.5568	-1.4322	-1.1864	-1.269	-1.3712
		beta-glucosidase	Cluster-13677.107009	-0.75421	-0.90509	-0.89301	-1.0143	-2.0574	-2.2363
		beta-glucosidase	Cluster-13677.107000	-1.4265	-1.7607	-1.4608	-1.2907	-1.9191	-2.4329
		beta-glucosidase	Cluster-13677.45491	2.7668	3.3411	2.2866	5.2179	5.0612	5.3063
		beta-glucosidase	Cluster-13677.49762	-1.3865	-1.2748	-1.9185	-3.0739	-1.8806	-2.2066
		beta-glucosidase	Cluster-13677.397843	2.2969	3.5193	3.5782	5.6407	5.766	5.4637
		beta-glucosidase	Cluster-13677.107008	-2.3257	-4.0938	-2.0658	-1.1345	-1.8217	-5.3099
		beta-glucosidase	Cluster-13677.320381	-1.4851	-2.1659	-3.9253	-2.33	-2.0481	-3.5816
K05349	EC3.2.1.21,bglX	beta-glucosidase	Cluster-13677.184117	1.8269	0.35322	0.53349	1.5625	0.90546	0.99385
		beta-glucosidase	Cluster-13677.223752	-1.3404	-1.4957	-3.2975	-0.77007	-0.20761	-2.2617
		beta-glucosidase	Cluster-13677.265220	2.3995	1.0568	1.3	1.3556	0.77028	1.125
		beta-glucosidase	Cluster-13677.265234	2.3391	1.2044	1.0743	1.646	1.0537	0.85375
		beta-glucosidase	Cluster-13677.189109	-2.3609	-1.0316	-8.0886	-7.4203	-2.8837	-3.1795
		beta-glucosidase	Cluster-13677.118292	-6.2896	-6.0117	-0.44246	-3.0537	-1.7526	-6.5517
		beta-glucosidase	Cluster-13677.282291	-2.4876	-1.3374	-1.4821	-1.5835	-2.8181	-3.938
K13068	EC2.4.1.120,BRT1	sinapate 1-glucosyltransferase	Cluster-13677.167738	2.1748	1.5742	0.41353	-4.4596	-0.027515	0.88634
K09753	EC1.2.1.44,CCR	cinnamoyl-CoA reductase	Cluster-13677.58141	3.912	1.616	3.2989	5.0828	5.0851	6.6602
		cinnamoyl-CoA reductase	Cluster-13677.58142	1.9996	-0.33845	1.2961	6.6161	6.8461	8.4258
		cinnamoyl-CoA reductase	Cluster-13677.53927	-2.6503	-2.3707	1.2773	5.0973	5.4965	7.5195
		cinnamoyl-CoA reductase	Cluster-13677.71229	-3.2231	-7.0877	-7.3179	0.25006	2.2213	-3.8802
		cinnamoyl-CoA reductase	Cluster-13677.58138	3.8103	0.2824	3.0153	4.5846	4.0471	6.1781
		cinnamoyl-CoA reductase	Cluster-13677.324044	-1.4546	-2.6501	-2.8751	-4.3019	-4.284	-5.8132
		cinnamoyl-CoA reductase	Cluster-13677.324042	-0.43931	-1.41	-5.0668	-4.3564	-4.9335	-5.6379
K00487	EC1.14.1311,CYP73A	trans-cinnamate 4-monooxygenase	Cluster-13677.393102	7.334	4.9979	6.2234	7.1009	8.3103	7.2861
		trans-cinnamate 4-monooxygenase	Cluster-13677.85955	4.1714	2.2023	1.121	4.1387	4.7586	3.987
K09755	CYP84A, F5H	ferulate-5-hydroxylase	Cluster-13677.435482	-4.5639	-7.2367	-7.4725	-10.491	-9.3411	-10.406
		ferulate-5-hydroxylase	Cluster-13677.170356	0.65943	0.9419	2.3837	3.1112	4.9467	4.2721
K09754	EC1.14.1336,CYP98A3	coumaroylquinate(coumaroylshikimate) 3'-monooxygenase	Cluster-13677.278471	0.2385	-1.0253	-1.5605	1.5764	1.3813	1.6421
K00083	EC1.1.1.195	cinnamyl-alcohol dehydrogenase	Cluster-13677.169486	-4.6808	-3.8189	-0.27774	1.3159	0.91235	-0.70221
		cinnamyl-alcohol dehydrogenase	Cluster-13677.305585	-2.9309	-2.4905	-3.9904	0.079993	1.528	1.9269
		cinnamyl-alcohol dehydrogenase	Cluster-13677.183692	-2.8476	-3.8998	-3.7613	-0.45036	-0.24991	-0.57861
		cinnamyl-alcohol dehydrogenase	Cluster-13677.410361	3.7789	3.1517	3.8518	7.6889	7.6989	6.9949
		cinnamyl-alcohol dehydrogenase	Cluster-13677.410360	3.6989	2.7343	3.8564	2.9884	5.2826	4.565
		cinnamyl-alcohol dehydrogenase	Cluster-13677.246579	-3.0106	-1.6516	-3.4348	0.11893	1.67	1.8092
		cinnamyl-alcohol dehydrogenase	Cluster-13677.246583	-4.929	-4.5463	-4.732	-0.51884	0.58277	1.0158
		cinnamyl-alcohol dehydrogenase	Cluster-13677.246588	-3.6109	-2.1763	-3.6693	0.80988	1.9343	1.7842
		cinnamyl-alcohol dehydrogenase	Cluster-13677.246584	-6.8575	-2.9948	-5.8511	0.94498	1.9555	2.0795
		cinnamyl-alcohol dehydrogenase	Cluster-13677.246585	-3.7291	-2.1485	-3.1909	-0.14486	1.1584	1.2661
		cinnamyl-alcohol dehydrogenase	Cluster-13677.246586	-4.3253	-2.1277	-4.437	0.20221	0.97124	1.0237
		cinnamyl-alcohol dehydrogenase	Cluster-13677.246587	-5.6671	-3.9188	-2.7288	0.66266	2.261	2.0963
		cinnamyl-alcohol dehydrogenase	Cluster-13677.223101	-1.5449	-1.8852	-2.2164	-0.92826	0.056994	-0.11432
		cinnamyl-alcohol dehydrogenase	Cluster-13677.223102	-1.3038	-1.8159	-1.9093	-1.2078	-0.39373	-0.73814
		cinnamyl-alcohol dehydrogenase	Cluster-13677.201498	-3.7915	-2.8187	-3.8186	0.3676	2.1442	1.7979
		cinnamyl-alcohol dehydrogenase	Cluster-13677.246578	-3.7935	-1.4798	-2.1444	1.4269	3.7855	3.8353
		cinnamyl-alcohol dehydrogenase	Cluster-13677.152232	-3.6235	-2.6382	-2.8401	-0.24343	1.3683	1.5432
		cinnamyl-alcohol dehydrogenase	Cluster-13677.261582	-1.5167	-1.8776	-2.2914	-0.99995	-0.52754	-1.3599
		cinnamyl-alcohol dehydrogenase	Cluster-13677.385327	-8.5223	-1.0826	-3.5713	2.4554	3.5318	1.8626
		cinnamyl-alcohol dehydrogenase	Cluster-13677.410358	3.383	1.1578	3.7333	4.5798	5.782	5.5247
		cinnamyl-alcohol dehydrogenase	Cluster-13677.410359	5.0203	4.3288	5.4911	5.3794	7.2242	6.3565
		cinnamyl-alcohol dehydrogenase	Cluster-13677.236368	-1.1959	-1.8095	-2.5006	-0.37288	-0.30371	-0.2034
K00430	EC1.11.1.7	peroxidase	Cluster-13677.209703	6.1423	4.5281	4.5271	3.3992	1.7583	0.13657
		peroxidase	Cluster-23456.3	-2.6509	-3.3023	-4.9118	-8.9251	-5.3234	-7.8767
		peroxidase	Cluster-23456.0	-3.8463	-3.5672	-2.3192	-7.0522	-5.0279	-6.9647
		peroxidase	Cluster-23456.1	-2.0632	-1.5134	-2.0643	-5.0741	-6.7551	-4.4512
		peroxidase	Cluster-13677.264029	3.5625	3.185	3.8098	0.89325	0.77839	1.1193
		peroxidase	Cluster-13677.264961	3.1388	2.3667	2.7193	1.6451	1.7053	1.6989
		peroxidase	Cluster-13677.435106	0.0073168	-3.296	-7.8774	-3.2613	-4.7891	-5.517
		peroxidase	Cluster-13677.330187	-0.65433	-1.0546	-4.1097	-0.44026	-1.6324	-0.96604
		peroxidase	Cluster-13677.165432	1.9118	0.63341	1.3238	0.91139	-0.026363	0.4884
		peroxidase	Cluster-13677.301272	4.0348	3.4049	3.6516	1.2504	0.0051141	0.50577
		peroxidase	Cluster-13677.376349	-0.033659	0.75443	0.42245	1.4556	1.9038	4.4924
		peroxidase	Cluster-13677.55680	3.9203	2.3981	2.9513	0.24697	-0.87825	-1.0588
		peroxidase	Cluster-13677.245341	-1.4576	-0.1277	-0.79622	2.6387	1.4729	0.032688
		peroxidase	Cluster-13677.400030	3.3753	1.3911	0.21295	6.0724	4.9821	4.0233
		peroxidase	Cluster-13677.85243	4.2005	2.4427	3.3287	-1.0852	1.0222	0.097148
		peroxidase	Cluster-13677.85244	6.1795	5.7094	5.4964	-1.8472	1.2177	0.008094
		peroxidase	Cluster-13677.146100	3.1953	0.78769	-0.45024	-0.13653	-1.9653	-3.0694
		peroxidase	Cluster-13677.23370	-0.65754	-3.1468	-5.6721	-3.3419	-3.8168	-4.9352
		peroxidase	Cluster-13677.245333	-1.5082	-0.34115	-0.97183	1.7048	1.0743	0.074795
		peroxidase	Cluster-33760.0	-2.6885	-5.9341	-2.9648	-2.4117	-1.2061	-4.098
		peroxidase	Cluster-13677.326129	-0.9871	-4.3445	-2.787	2.5129	0.96117	2.4205
		peroxidase	Cluster-13677.85794	7.3216	3.3783	3.9365	6.7385	5.4496	3.5979
		peroxidase	Cluster-13677.79879	6.5394	3.9153	4.2521	3.6815	2.8691	1.55
		peroxidase	Cluster-13677.328168	-1.1033	-2.9941	-1.9802	-0.99272	-2.2945	-1.6181
		peroxidase	Cluster-13677.260785	-3.4215	-4.1024	-1.9241	-5.1236	-3.9822	-5.9965
		peroxidase	Cluster-13677.303273	0.76074	-1.0461	-1.4512	2.7521	3.4328	2.793
		peroxidase	Cluster-13677.303271	0.81949	-1.3129	-2.5834	5.876	5.6757	6.1364
		peroxidase	Cluster-13677.404445	3.0066	3.2674	3.8924	0.23958	-1.6334	-1.2521
		peroxidase	Cluster-13677.235197	-0.15106	-0.23319	-1.8408	5.6288	4.6931	1.6275
		peroxidase	Cluster-13677.114108	0.37597	1.415	1.5313	1.6518	2.6937	2.3091
		peroxidase	Cluster-13677.114106	4.2981	6.1324	3.6912	1.0093	8.1283	6.879
		peroxidase	Cluster-13677.114105	0.63656	1.2027	1.7935	2.876	3.1505	3.5233
		peroxidase	Cluster-13677.235565	6.8171	5.7491	7.769	6.0169	6.0708	4.4198
		peroxidase	Cluster-13677.303286	0.12044	-1.073	-1.6945	2.9037	3.1462	3.0572
		peroxidase	Cluster-13677.235568	6.453	4.7503	7.9071	7.5593	7.6255	6.9369
		peroxidase	Cluster-13677.23368	-1.1596	-5.333	-6.2326	-4.3301	-3.0331	-9.1413
		peroxidase	Cluster-13677.23369	-3.3417	-5.3679	-6.5636	-3.6867	-5.7189	-6.0775
		peroxidase	Cluster-13677.269461	4.209	4.1039	3.8463	1.9471	2.2287	1.7936
		peroxidase	Cluster-13677.352679	-3.1089	-4.591	-4.6547	-0.80307	-2.9131	-4.1955
		peroxidase	Cluster-13677.194578	-1.0686	-1.6213	-1.8956	-2.6269	-3.2872	-3.9357
		peroxidase	Cluster-13677.84466	8.7707	7.2995	9.3067	0.9618	1.3379	2.4935
		peroxidase	Cluster-13677.156426	-1.8579	-1.736	-2.2396	-1.0767	0.11275	-0.045577
		peroxidase	Cluster-13677.382488	4.2198	1.8978	1.7537	3.4274	2.5205	1.4191
		peroxidase	Cluster-13677.114109	-1.4908	-0.31595	-0.20551	2.2768	1.4715	1.8965
		peroxidase	Cluster-13677.86138	4.8831	1.7732	3.8715	4.5477	1.3504	1.0905
		peroxidase	Cluster-13677.45781	-1.7285	-0.32814	-6.0784	0.13977	-1.4223	0.064088
		peroxidase	Cluster-13677.125053	4.6654	4.1383	3.8204	4.0591	3.587	3.4051
		peroxidase	Cluster-13677.113685	-0.39115	-3.2365	-2.215	2.2753	1.5447	1.2832
		peroxidase	Cluster-13677.125056	5.6295	4.4336	4.2967	6.773	6.3113	3.9444
		peroxidase	Cluster-13677.125059	3.0647	2.2978	2.3244	1.2291	1.6937	0.45479
		peroxidase	Cluster-13677.229778	1.7395	-1.5293	-1.1029	4.0837	1.3995	0.29444
		peroxidase	Cluster-13677.102330	-1.1067	-1.8126	-2.4533	-1.884	-0.77559	-0.66022
		peroxidase	Cluster-13677.374878	7.3705	5.3309	6.0065	3.5727	1.6335	1.6477
		peroxidase	Cluster-13677.274979	-0.75832	-2.4241	-2.5821	0.62112	1.4095	1.2909
		peroxidase	Cluster-13677.229777	2.0188	-1.6349	-1.8263	3.8022	1.5511	-0.052689
		peroxidase	Cluster-13677.23367	-5.716	-5.4392	-5.6719	-7.0516	-6.8604	-6.9654
		peroxidase	Cluster-13677.424268	4.1761	4.5527	4.9794	0.099508	-2.8239	-1.4663
		peroxidase	Cluster-13677.350311	-1.6482	-1.0105	-0.52057	-3.1343	-3.0402	-5.0206
		peroxidase	Cluster-13677.282883	2.9645	2.3651	2.8033	2.9988	2.2078	2.2376
		peroxidase	Cluster-13677.235567	-1.5526	-2.5052	-0.66781	0.21526	-0.25391	0.22213
		peroxidase	Cluster-13677.245345	-2.2877	-1.2478	-1.4433	-1.1003	-0.36734	-1.416
		peroxidase	Cluster-13677.366081	3.1618	3.045	3.6871	2.0865	1.8231	2.1676
		peroxidase	Cluster-13677.122706	0.28632	-0.9585	-0.43042	-0.32991	-2.0922	-2.3179
		peroxidase	Cluster-13677.264030	2.6196	2.975	3.6311	4.3146	4.0607	2.6976
		peroxidase	Cluster-13677.350147	0.21493	-3.2283	-4.3117	1.1162	1.0173	1.4337
		peroxidase	Cluster-13677.102328	-0.35401	-0.54817	-0.49768	-2.3583	-1.2865	-1.086
		peroxidase	Cluster-13677.264040	3.3354	3.0369	2.4838	0.78596	0.87802	0.73606
		peroxidase	Cluster-13677.229767	2.5094	-0.82201	-0.024009	4.2501	1.8708	0.57804
		peroxidase	Cluster-13677.259583	-1.0266	-1.6017	-1.6988	0.26067	-0.76742	-0.75923
		peroxidase	Cluster-13677.116757	-2.1343	-4.6737	-4.1285	-1.3967	1.2606	-0.20871
		peroxidase	Cluster-13677.374884	6.1079	4.1007	4.8163	3.9469	1.6942	1.462
		peroxidase	Cluster-13677.255725	5.8915	1.0351	4.111	7.6117	5.0439	2.962
		peroxidase	Cluster-13677.374880	8.5157	6.6145	7.3162	4.7961	2.2279	2.1407
		peroxidase	Cluster-13677.328170	-1.4064	-2.3996	-2.2839	-1.2081	-1.8293	-1.4313
		peroxidase	Cluster-13677.264027	3.8356	3.3311	4.5256	1.7857	1.4881	1.6055
		peroxidase	Cluster-13677.264026	3.8708	3.6321	4.6435	3.0681	2.4055	2.6156
		peroxidase	Cluster-13677.330185	0.38202	-1.192	-4.38	-0.58466	-2.06	-0.9842
		peroxidase	Cluster-13677.257955	0.2719	-0.9329	0.64849	0.0070556	-1.9789	-2.8609
		peroxidase	Cluster-11233.4	-3.0701	-3.6979	-5.4756	-2.6573	-2.9215	-3.0328
		peroxidase	Cluster-13677.315770	-0.59019	-1.877	-1.1218	-2.4565	-2.8642	-3.9729
		peroxidase	Cluster-13677.55679	3.199	2.2852	2.0271	2.0309	-1.0504	-1.7006
		peroxidase	Cluster-13677.374879	5.8952	4.1601	4.6806	3.734	1.6861	1.7654
		peroxidase	Cluster-13677.229754	1.3201	-1.6201	-1.321	3.7336	1.3368	-0.27887
		peroxidase	Cluster-13677.350143	-0.32407	-3.0283	-7.5477	2.3737	0.92095	-0.45542
		peroxidase	Cluster-13677.331051	-0.95359	-0.98201	-2.4868	0.060123	-1.3238	-1.9706
		peroxidase	Cluster-13677.339072	-0.87065	-5.275	-2.5335	-0.55768	1.3124	0.22623
		peroxidase	Cluster-13677.85245	4.5773	3.4512	3.6819	-3.4356	-2.2814	-2.3837
		peroxidase	Cluster-13677.374882	2.7051	0.79334	2.1174	4.7642	-0.076252	0.329
		peroxidase	Cluster-13677.229404	-0.74596	-1.0047	-2.4382	0.83195	1.9436	-5.2213
		peroxidase	Cluster-13677.146101	2.0933	-0.04533	-1.6617	-0.16152	-2.0025	-3.3065
		peroxidase	Cluster-13677.436457	-2.3899	-3.7337	-3.9568	-2.589	-2.4303	-3.5299
		peroxidase	Cluster-13677.315769	-0.67231	-1.7223	-1.4994	-2.4214	-3.41	-3.7405
		peroxidase	Cluster-13677.343756	7.4341	6.0337	6.5624	0.74104	-4.0305	-0.8575
		peroxidase	Cluster-13677.45780	-1.3911	-0.89279	-1.3459	-2.2422	-1.7514	-2.1077
		peroxidase	Cluster-13677.257958	1.3369	0.016451	1.3192	-0.46016	-2.1405	-2.9584
		peroxidase	Cluster-13677.350148	-0.074405	-2.8115	-3.8607	1.4188	1.3667	-1.0032
		peroxidase	Cluster-13677.93194	7.3359	5.9412	5.894	4.4475	2.6474	2.6032
		peroxidase	Cluster-13677.350312	-2.0048	-1.0443	-0.85955	-2.6969	-5.4258	-3.7412
		peroxidase	Cluster-13677.363690	7.2502	4.7975	3.0319	4.2711	2.923	-1.2212
		peroxidase	Cluster-13677.88220	9.4402	6.549	6.2706	5.6671	5.2596	2.5469
		peroxidase	Cluster-13677.112504	-0.56948	-3.8468	-5.1985	-4.2635	-5.4829	-8.9302
		peroxidase	Cluster-13677.112505	0.62417	-3.2929	-2.9275	-4.61	-3.8993	-3.9023
		peroxidase	Cluster-13677.112506	0.93329	-2.4931	-2.8464	-4.9122	-4.3742	-3.8353
		peroxidase	Cluster-13677.112507	-1.017	-2.8818	-4.3695	-5.0585	-5.0459	-6.9473
		peroxidase	Cluster-13677.112503	-0.69654	-3.4654	-6.0533	-4.4279	-4.6769	-5.9343
K00588	EC2.1.1.104	caffeoyl-CoA O-methyltransferase	Cluster-13677.225401	-1.152	-1.0415	-1.0849	-1.8201	-1.856	-2.2766
		caffeoyl-CoA O-methyltransferase	Cluster-13677.229287	-1.4399	-1.4446	-1.5456	-1.6395	-1.9048	-1.956
K13066	EC2.1.1.68, COMT	caffeic acid 3-O-methyltransferase	Cluster-25318.0	3.9338	3.3804	5.1552	5.9468	6.1203	6.9726
		caffeic acid 3-O-methyltransferase	Cluster-13677.83181	-2.0265	-2.1119	-2.6531	0.96987	-0.19305	-0.7442
		caffeic acid 3-O-methyltransferase	Cluster-13677.428244	6.7432	5.5701	7.6927	5.6343	5.466	7.1416
		caffeic acid 3-O-methyltransferase	Cluster-13677.443315	1.6702	2.0222	1.8235	0.88309	1.5074	2.4077
K13065	EC2.3.1.133, HCT	shikimate O-hydroxycinnamoyltransferase	Cluster-13677.205294	-1.7934	-1.742	-3.1813	-1.9207	-3.8144	-2.8012
		shikimate O-hydroxycinnamoyltransferase	Cluster-13677.205293	-1.4941	-1.5635	-1.3972	-1.4401	-2.9484	-2.8473
		shikimate O-hydroxycinnamoyltransferase	Cluster-13677.261159	-1.3274	-1.8856	-3.1338	4.9413	4.3331	3.0663
		shikimate O-hydroxycinnamoyltransferase	Cluster-13677.40011	0.41123	0.36405	-0.84752	-1.0606	-1.9218	-2.3917
		shikimate O-hydroxycinnamoyltransferase	Cluster-13677.38440	0.37382	-0.45676	-0.54904	-1.7746	-0.99172	-2.1039
		shikimate O-hydroxycinnamoyltransferase	Cluster-13677.176988	-1.0429	-2.0459	-3.3603	4.0889	2.8954	2.1576
		shikimate O-hydroxycinnamoyltransferase	Cluster-13677.240447	-1.7642	-1.8963	-2.0545	-1.3307	-0.6696	-0.83315
		shikimate O-hydroxycinnamoyltransferase	Cluster-13677.205286	-2.1395	-3.8813	-2.239	-1.5547	-2.1305	-0.99458
		shikimate O-hydroxycinnamoyltransferase	Cluster-13677.205279	-2.7998	-3.0501	-2.9128	-1.7463	-2.3359	-2.3808
		shikimate O-hydroxycinnamoyltransferase	Cluster-13677.113494	0.34351	1.5152	2.4067	2.6628	3.3304	3.9164
		shikimate O-hydroxycinnamoyltransferase	Cluster-13677.221046	-1.5607	-1.691	-2.1174	-0.94452	-0.36455	-0.46876
		shikimate O-hydroxycinnamoyltransferase	Cluster-13677.302238	-0.79078	-1.9113	-2.8895	-1.0171	-0.59539	-0.53725
		shikimate O-hydroxycinnamoyltransferase	Cluster-13677.265647	-1.8105	-1.612	-1.9248	-0.64589	-2.7056	-1.3184
		shikimate O-hydroxycinnamoyltransferase	Cluster-13677.19934	-0.083191	-2.2866	0.114	-5.6703	-4.2209	-2.4273
		shikimate O-hydroxycinnamoyltransferase	Cluster-13677.205285	-1.2153	-0.93969	-1.3766	-1.4096	-3.1038	-2.3411
		shikimate O-hydroxycinnamoyltransferase	Cluster-13677.205288	-2.0349	-3.0745	-3.4787	-1.266	-0.97843	-1.2157
		shikimate O-hydroxycinnamoyltransferase	Cluster-13677.178852	-2.9892	-5.9483	-2.4598	-1.3733	-2.296	-1.804
		shikimate O-hydroxycinnamoyltransferase	Cluster-13677.261160	-1.7046	-2.9784	-4.4527	5.1267	4.2968	3.8885
K01188	EC3.2.1.21	beta-glucosidase	Cluster-13677.171902	1.6099	1.0788	0.20558	-0.73761	-1.2037	0.49629
		beta-glucosidase	Cluster-13677.306009	6.0417	6.0318	5.7025	2.6462	1.153	2.8836
		beta-glucosidase	Cluster-26962.0	-4.337	-3.6022	-6.1865	-6.0006	-5.7919	-3.083
		beta-glucosidase	Cluster-13677.27749	-2.8012	-5.0819	-5.3055	-5.1103	-8.0286	-8.1325
		beta-glucosidase	Cluster-13677.343619	0.92068	-0.35362	2.6035	-2.4499	1.5126	1.2293
		beta-glucosidase	Cluster-13677.221550	-1.1577	-1.9963	-1.297	-2.466	-1.7131	-2.1524
		beta-glucosidase	Cluster-13677.314756	1.3015	1.0811	2.431	0.726	0.14567	0.66708
		beta-glucosidase	Cluster-13677.291919	8.8846	7.6605	7.4568	1.909	2.4918	0.53393
		beta-glucosidase	Cluster-13677.166653	0.61639	1.393	2.1652	-0.51525	0.37031	1.1586
		beta-glucosidase	Cluster-13677.166671	1.7268	2.2923	2.7887	-0.15199	1.0037	1.4795
		beta-glucosidase	Cluster-13677.27754	-0.68419	-0.49178	-4.6144	-5.0492	-8.7914	-8.9134
		beta-glucosidase	Cluster-13677.27750	-2.6753	-3.3036	-4.3389	-5.4547	-8.2363	-8.3511
		beta-glucosidase	Cluster-13677.238273	-0.385	-2.0861	-0.90649	-1.9266	-0.77456	-1.8037
		beta-glucosidase	Cluster-13677.265229	-0.81358	-1.7116	-3.6735	-1.32	-2.9232	-2.8845
		beta-glucosidase	Cluster-13677.166663	0.90914	1.4639	1.8523	-0.14813	0.18641	0.91804
		beta-glucosidase	Cluster-13677.27746	-0.64458	-5.1196	-2.4719	-7.7787	-5.7053	-6.7281
		beta-glucosidase	Cluster-13677.27747	0.58005	-2.695	-2.9191	-8.2577	-8.0581	-8.1696
		beta-glucosidase	Cluster-13677.26590	-3.7792	-2.5383	-3.7233	-7.0665	-6.871	-4.5262
		beta-glucosidase	Cluster-13677.166670	1.9661	2.5981	2.7515	0.02527	0.38543	1.1953
		beta-glucosidase	Cluster-13677.141828	-0.47328	-1.1323	-1.5134	-1.7664	-0.20466	-2.6975
		beta-glucosidase	Cluster-13677.415699	-2.6227	-1.817	-2.7009	3.7949	2.2376	2.2729
		beta-glucosidase	Cluster-13677.186095	6.2914	5.7784	6.0471	1.4814	1.9027	1.6394
		beta-glucosidase	Cluster-13677.242911	-0.52583	2.1113	-0.63533	6.632	5.8444	7.171
		beta-glucosidase	Cluster-18219.1	0.23754	-3.6475	-6.223	-8.0239	-6.8754	-7.939
		beta-glucosidase	Cluster-13677.18075	-0.20634	-0.88849	-1.1203	-4.9359	0.52251	-2.2011
		beta-glucosidase	Cluster-13677.241579	-0.13	-0.63881	-1.3343	-2.266	-1.983	-1.9318
		beta-glucosidase	Cluster-13677.238269	-11.374	-11.094	-7.9112	-0.91428	2.3862	-0.82521
		beta-glucosidase	Cluster-13677.141813	-0.40395	-1.2385	-1.4919	-0.3466	-0.35243	-1.9407
		beta-glucosidase	Cluster-13677.361588	0.75208	1.7956	1.2124	0.78501	1.7765	1.6333
		beta-glucosidase	Cluster-13677.361584	0.65911	1.0205	1.0054	1.5806	1.4043	1.8379
		beta-glucosidase	Cluster-13677.361585	-0.10433	0.65202	0.24315	1.5039	1.9212	1.9933
		beta-glucosidase	Cluster-13677.238277	-3.7136	-4.3454	-3.0736	-2.5002	-0.96485	-0.42104
		beta-glucosidase	Cluster-13677.238275	2.9713	1.5542	3.0459	-7.3491	-1.3696	-1.1375
		beta-glucosidase	Cluster-13677.242901	-0.67204	-0.53148	-2.4091	-1.3806	-1.7774	-3.1253
		beta-glucosidase	Cluster-13677.361574	0.833	2.0693	1.4456	1.3972	1.6269	1.5091
		beta-glucosidase	Cluster-13677.361577	0.78657	2.5998	1.3453	0.56147	0.93734	0.96217
		beta-glucosidase	Cluster-13677.166657	0.99354	1.5865	2.0312	-0.33927	0.12164	0.8123
		beta-glucosidase	Cluster-13677.218109	0.2019	-1.2381	2.1117	1.3222	1.1509	1.1316
		beta-glucosidase	Cluster-13677.166655	0.63877	1.0959	1.7827	-0.11602	0.10877	0.98515
		beta-glucosidase	Cluster-13677.141827	-2.2871	-3.5263	-2.9066	-1.4508	-0.64016	-2.0987
		beta-glucosidase	Cluster-13677.141824	-0.50844	-1.1426	-1.4216	-0.95931	-0.60125	-2.2292
		beta-glucosidase	Cluster-13677.248040	-1.5306	-9.6296	-2.5831	-1.8171	-1.0778	-3.0643
		beta-glucosidase	Cluster-13677.242899	-2.3213	-10.751	-2.487	-0.64517	-0.085219	-3.8591
K10775	EC4.3.1.24	phenylalanine ammonia-lyase	Cluster-13677.227732	-1.4709	-1.8765	-2.0027	2.277	2.9576	2.571
		phenylalanine ammonia-lyase	Cluster-13677.252394	-2.8313	-2.7831	-3.2856	1.4628	0.62348	0.83788
		phenylalanine ammonia-lyase	Cluster-13677.252396	-2.8664	-2.538	-3.4331	2.8836	1.8276	1.7538
		phenylalanine ammonia-lyase	Cluster-13677.252393	-3.1217	-3.2645	-3.8241	2.8175	1.906	1.8179
		phenylalanine ammonia-lyase	Cluster-13677.182623	-1.296	-1.902	-1.8941	-2.3555	-2.1807	-2.6981
		phenylalanine ammonia-lyase	Cluster-13677.227731	-1.6797	-2.4994	-1.392	-0.89952	-0.26302	-0.13187
		phenylalanine ammonia-lyase	Cluster-13677.263404	-0.75251	-3.1376	-1.6076	2.7775	2.7504	2.9953
		phenylalanine ammonia-lyase	Cluster-13677.220869	-1.8217	-2.2826	-1.9518	0.20712	0.098879	0.28743
		phenylalanine ammonia-lyase	Cluster-13677.220868	-0.67128	-0.72555	-1.2586	2.8912	2.7951	3.0534
		phenylalanine ammonia-lyase	Cluster-13677.211596	-0.40758	-1.9268	-1.494	2.7864	3.4063	3.0383
		phenylalanine ammonia-lyase	Cluster-13677.241761	-2.7995	-2.9864	-3.5424	2.4998	1.8234	1.471
		phenylalanine ammonia-lyase	Cluster-13677.241760	-3.6958	-3.2712	-4.0144	2.3831	1.554	1.1004
		phenylalanine ammonia-lyase	Cluster-13677.241763	2.6643	1.6617	2.563	2.7375	2.0869	1.8508
		phenylalanine ammonia-lyase	Cluster-13677.241762	-1.7962	-2.8663	-2.3542	-0.86332	-0.30065	-0.03285
		phenylalanine ammonia-lyase	Cluster-13677.241765	-4.1918	-4.5915	-5.0572	2.5901	1.5874	1.3096
		phenylalanine ammonia-lyase	Cluster-13677.241764	-3.9104	-3.8114	-4.8837	2.0631	1.2055	0.61452
		phenylalanine ammonia-lyase	Cluster-13677.252395	-2.7327	-2.7097	-3.7572	3.0385	2.2053	2.4451
		phenylalanine ammonia-lyase	Cluster-13677.301413	-3.8037	-3.1795	-3.7552	3.2809	2.2496	1.4091
		phenylalanine ammonia-lyase	Cluster-13677.237622	-1.7375	-2.5102	-1.6799	-0.37639	-0.015619	0.2038
		phenylalanine ammonia-lyase	Cluster-13677.248118	-1.2435	-2.032	-2.1083	-2.5936	-2.8676	-3.1107
		phenylalanine ammonia-lyase	Cluster-13677.280468	-1.4103	-2.7726	-1.0055	-0.26292	-0.076084	0.45208
K13064	EC4.3.1.25,PTAL	phenylalanine/tyrosine ammonia-lyase	Cluster-13677.227704	-0.8985	-1.6505	-1.6055	-2.3874	-2.8773	-2.642
		phenylalanine/tyrosine ammonia-lyase	Cluster-13677.265743	-1.5987	-1.9274	-1.6369	-2.8124	-3.3459	-2.6038
		phenylalanine/tyrosine ammonia-lyase	Cluster-13677.227707	-0.7993	-1.7303	-1.9663	-2.2158	-2.7951	-2.766
K12355	EC1.2.1.68,REF1	coniferyl-aldehyde dehydrogenase	Cluster-13677.435853	-0.93462	-2.6043	-3.1722	-0.76622	-0.59974	-0.92181
K09756	EC2.3.1.91,SCPL19, SNG2	serine carboxypeptidase-like 19	Cluster-13677.295330	4.5619	3.4668	5.4596	1.2393	1.4361	1.0062
