# Supplementary material for: Global Gene Responses of Resistant and Susceptible Sugarcane Cultivars to Acidovorax avenae subsp. avenae Identified Using Comparative Transcriptome Analysis
Source: Microorganisms. 2019 Dec 19;8(1):10. doi: 10.3390/microorganisms8010010 (PMC7022508; doi:10.3390/microorganisms8010010)
Supplement: Supplementary file 1 [file microorganisms-08-00010-s001.zip › Table S8-20191120.xlsx]

## Sheet: Sheet1
Table S8. RNA sequencing results for transcript levels (log2Fold Change) for differentially expressed genes (DEGs) in ROC22 and MT11-610 enriched in the KEGG plant hormone signal transduction pathway (ko04075).
Ko ID	Ko name	Ko description	Unigene ID	ROC22			MT11-610
				24 hpi	48 hpi	72hpi	24 hpi	48 hpi	72hpi
K14432	ABF	ABA responsive element binding factor	Cluster-13677.189025	0.33653	0.51617	0.48545	1.1313	2.0609	3.3593
			Cluster-13677.384374	-0.06609	-0.66063	-0.077989	-3.6749	-1.0625	-2.294
			Cluster-13677.173857	-1.3994	-1.5955	-1.7767	-0.42444	-0.11612	-0.79152
			Cluster-13677.180955	0.53395	-1.4553	1.0716	1.5015	2.9274	4.1205
			Cluster-13677.111257	0.42977	0.27957	1.2827	1.0152	1.1622	1.5445
			Cluster-13677.143432	1.1516	-0.041958	0.44212	2.1794	3.0146	3.0141
			Cluster-13677.143431	0.49621	0.93227	0.32642	0.64707	0.73366	1.5057
			Cluster-13677.200215	0.83608	0.72143	0.7898	1.4771	2.0861	3.6299
K14489	AHK2_3_4	arabidopsis histidine kinase 2/3/4 (cytokinin receptor)	Cluster-13677.338314	-1.0095	-2.0062	-0.87198	-0.53878	-2.4072	-3.3145
			Cluster-13677.114231	-1.0633	-1.6218	-1.5565	-0.65613	-0.99939	-1.5387
			Cluster-13677.95461	-0.52389	-1.0795	-0.75112	-7.6515	-7.4427	-7.5607
			Cluster-13677.93977	-2.066	-1.4626	-0.91977	-2.1793	-1.1069	0.18576
			Cluster-13677.288475	1.7727	0.47646	0.14358	-0.066103	-0.38053	-2.1826
			Cluster-13677.320423	-2.168	-6.4437	-1.9235	6.0146	7.3982	6.5971
			Cluster-13677.288468	0.98034	1.1793	0.15436	-0.30103	-4.9212	-0.95362
			Cluster-13677.93980	5.161	6.7128	7.8559	2.3544	2.6425	2.0422
			Cluster-13677.93982	-1.7671	-1.4682	-1.1161	-6.8139	-6.5963	-5.7635
K14490	AHP	histidine-containing phosphotransfer peotein	Cluster-13677.309455	-1.1509	-1.5612	-1.4112	0.62677	0.30051	0.45381
			Cluster-13677.303382	-1.9171	-0.45903	-6.1768	-2.8066	-4.3018	-3.3561
			Cluster-13677.303380	-1.6144	-1.4497	-1.2975	-1.4632	-2.2399	-1.6707
K14492	ARR-A	two-component response regulator ARR-A family	Cluster-13677.283386	1.3412	2.5655	2.6131	-0.10503	0.81654	-0.19378
			Cluster-13677.235212	-0.80041	0.12175	-1.608	-2.26	1.1684	-1.6557
			Cluster-13677.234747	-2.6475	-2.3874	-2.2423	0.42193	0.624	0.25329
			Cluster-13677.151756	-2.5649	-2.7809	-0.39337	-1.6828	0.52416	1.484
			Cluster-13677.368323	3.4867	3.2022	2.0782	-1.8472	-1.6537	-1.7573
K14491	ARR-B	two-component response regulator ARR-B family	Cluster-13677.344069	-0.51883	-0.92909	-1.7609	-1.3301	-1.4098	-1.1678
K13946	AUX1, LAX	auxin influx carrier (AUX1 LAX family)	Cluster-13677.213449	0.11661	-0.027216	-0.52625	-1.5392	-2.6869	-1.9485
			Cluster-13677.255480	-0.37339	-0.7762	-0.87308	-1.6698	-2.697	-1.862
			Cluster-13677.214365	-2.7595	-3.2311	-4.3113	-3.5473	-1.4096	-3.1209
			Cluster-13677.230822	-2.6175	-2.8033	-4.2107	-1.9625	-0.8653	-1.5207
			Cluster-13677.250280	-2.1869	-2.1041	-3.8805	-1.4075	-0.97989	-1.5367
			Cluster-13677.300061	-1.4588	-1.7312	-6.8327	-0.36872	-0.55684	-0.44225
			Cluster-13677.214364	-2.2105	-2.2655	-3.4202	-1.74	-1.1611	-1.3377
K14502	BIN2	protein brassinosteroid insensitive 2	Cluster-13677.156607	-0.95269	-4.2584	-2.8755	0.10457	0.90899	-0.53839
			Cluster-13677.223818	-0.33263	-2.3575	-0.85687	-1.5072	-6.022	-2.3692
			Cluster-13677.156608	-1.8077	-2.2335	-3.0792	-1.0898	-1.5795	-1.4995
K14499	BKI1	BRI1 kinase inhibitor 1	Cluster-13677.316672	-0.30899	-1.1789	-1.6341	-1.9695	-1.602	-1.782
K13415	BRI1	protein brassinosteroid insensitive 1	Cluster-13677.91394	2.4312	1.818	1.4468	-0.80819	-0.53524	-0.79203
			Cluster-13677.91395	2.4177	2.0551	1.7864	0.51074	-0.27059	0.10082
			Cluster-13677.91393	2.2513	2.1676	1.1106	0.52263	-0.29919	-0.26347
K14500	BSK	BR-signaling kinase	Cluster-13677.242925	-0.87632	-1.5333	-2.0281	-1.1753	-0.29505	-2.3233
			Cluster-13677.435093	-0.98883	-1.5304	-1.1541	-1.228	-2.1262	-1.2522
			Cluster-13677.318837	5.9028	5.506	6.1414	-2.7295	0.26284	-0.38404
			Cluster-13677.318843	2.8922	3.9457	4.4027	-1.5109	0.52666	-0.79872
K14510	CTR1	serine/threonine-protein kinase CTR1	Cluster-13677.108035	4.3202	4.5619	4.7435	0.56577	0.82849	1.6001
			Cluster-13677.108047	3.6966	4.9016	4.4424	-0.40934	0.85033	-0.33789
			Cluster-13677.108044	-1.6391	-6.2019	-8.8673	-1.0398	-0.17589	-0.48009
			Cluster-13677.108041	6.2917	7.4881	7.761	1.0839	0.20811	1.7519
			Cluster-13677.108051	2.0609	2.54	2.5043	-0.21053	0.064779	0.19889
			Cluster-13677.108037	4.1089	4.6211	4.8781	-0.22847	0.76112	0.28566
			Cluster-13677.108036	1.685	1.9986	2.0553	-0.52457	0.55238	0.12618
K14505	CYCD3	cyclin D3, plant	Cluster-13677.38016	7.8211	1.0351	6.2629	-5.2157	-5.7358	-8.2414
K14494	DELLA	DELLA protein	Cluster-13677.416589	-0.86552	-1.7643	-1.0772	-1.2821	-2.5232	-1.9888
K14515	EBF1_2	EIN3-binding F-box protein	Cluster-13677.263387	-0.66105	-0.37188	-1.6038	-0.27635	-0.02036	-0.022473
			Cluster-13677.263385	-5.8426	-1.5787	-0.52673	8.0022	4.5879	7.6896
K14513	EIN2	ethylene-insensitive protein 2	Cluster-13677.290809	-0.10095	-7.8016	-0.83776	-1.4797	-1.5827	-2.3375
			Cluster-13677.212428	2.1328	1.4543	2.4706	-0.53277	0.38184	-0.30297
			Cluster-13677.231612	0.96778	1.56	1.7609	0.064592	-0.17089	0.25988
K14514	EIN3	ethylene-insensitive protein 3	Cluster-13677.369003	-1.2089	-1.6712	-1.9259	-1.0009	-1.1361	-1.9381
K14516	ERF1	ethylene-responsive transcription factor 1	Cluster-13677.423269	-2.2548	-1.798	-1.846	-4.8711	-2.8412	-4.7788
			Cluster-13677.423268	-1.196	-3.784	-1.8976	1.0399	-3.5775	0.4733
			Cluster-13677.423270	-1.6518	-1.6822	-2.4883	0.33558	-0.84521	-1.2164
K14509	ETR, ERS	ethylene receptor	Cluster-13677.32332	2.6787	4.9848	4.6974	-1.6663	-5.9089	-1.351
			Cluster-13677.38471	-0.74736	-2.6925	-7.3883	-1.3723	0.58001	-3.0458
			Cluster-13677.186968	1.5848	2.0258	1.0885	0.2882	-0.044653	-0.064629
			Cluster-13677.186966	0.94006	0.55724	-0.26813	-8.8088	-0.52931	-8.7211
K14487	GH3	auxin responsive GH3 gene family	Cluster-13677.58320	1.1018	-0.19596	-0.724	-1.5575	-3.2436	-2.6752
			Cluster-13677.8804	6.2786	4.8214	4.1242	8.6069	5.1566	4.5177
			Cluster-13677.196016	1.2988	2.6424	-2.3295	5.1801	3.4765	3.8182
			Cluster-13677.196015	1.7776	2.883	-1.9279	4.23	3.4596	3.128
			Cluster-13677.82133	6.565	6.0313	4.6775	4.8287	2.4978	3.3758
			Cluster-13677.82134	5.4946	6.3504	4.7378	5.3528	3.5127	3.2931
			Cluster-13677.386437	5.8089	5.0982	4.5119	4.2258	1.648	2.7308
			Cluster-13677.82469	4.4158	1.2506	0.42356	0.19764	-1.9134	-1.282
			Cluster-13677.333023	1.5068	2.8911	2.5243	6.0135	5.6176	2.4882
			Cluster-13677.93066	1.6249	3.6477	3.185	4.45	3.9114	1.2587
			Cluster-13677.196018	1.1308	2.309	-2.7112	5.3773	4.4266	4.5826
			Cluster-13677.82137	5.772	5.6873	5.22	4.1542	3.0367	2.0519
			Cluster-13677.343497	2.0514	3.4601	-1.3527	5.117	3.7102	4.036
			Cluster-13677.82136	6.6684	5.1421	5.4098	3.4374	-0.70478	1.5207
			Cluster-13677.8807	6.0603	4.0379	3.8931	6.3425	2.7471	2.3946
			Cluster-13677.363323	4.8822	4.4758	3.6031	3.8212	0.63322	1.2281
K14493	GID1	gibberellin receptor GID1	Cluster-13677.231142	-0.37032	-0.61364	-0.92543	-10.656	1.3673	-0.71047
K14484	IAA	auxin-responsive protein IAA	Cluster-13677.131717	5.2113	6.0389	5.1751	1.0389	1.6944	1.1877
			Cluster-13677.269059	1.7638	0.87938	-1.4004	0.95762	0.46453	-1.4167
			Cluster-13677.215864	-0.44115	-0.99119	-1.6526	-0.23732	-1.0192	-1.3772
			Cluster-13677.153304	-1.2006	-1.8944	-1.7513	-0.46965	-1.0081	-0.77994
			Cluster-13677.295660	-0.16575	-0.89883	-1.4324	-1.6899	-1.6864	-2.4599
			Cluster-13677.199778	-2.1838	-0.70335	-1.7046	1.449	1.244	0.68202
			Cluster-13677.96225	1.1921	-0.88662	-0.18884	3.5553	3.1157	2.2484
			Cluster-13677.96223	1.1904	-0.91226	-0.99093	4.4128	3.5458	2.4766
			Cluster-13677.131712	1.9773	1.8263	1.4202	1.8338	1.9303	1.9885
			Cluster-13677.131710	2.1002	2.1371	1.0197	1.3362	1.6862	2.2684
			Cluster-13677.131711	1.092	1.2797	0.76952	1.8653	1.6891	2.891
			Cluster-13677.367319	4.3568	1.7399	1.2498	3.7955	2.4806	2.6695
			Cluster-28247.0	-0.072639	-0.70824	-1.0802	3.6605	2.861	4.2904
			Cluster-13677.257316	-0.43256	0.32813	-2.0172	0.59514	0.43903	-0.53934
			Cluster-13677.106530	-0.63163	-1.7176	-2.1124	-1.155	-1.6365	-1.9931
			Cluster-13677.96224	1.0626	-0.61938	-0.33692	3.2192	2.9131	1.4201
			Cluster-13677.210051	2.0192	2.0644	1.6745	0.16253	-0.47485	-0.72285
			Cluster-13677.210050	1.7947	1.8343	1.1963	0.22233	-0.049455	-0.12359
			Cluster-13677.153282	-1.638	-2.4077	-3.0656	-2.2605	-3.7478	-4.3122
			Cluster-13677.210058	1.9137	2.0432	1.5062	0.34561	-0.41134	-0.30425
			Cluster-13677.245826	-0.10121	-3.135	-3.3691	-2.5494	-3.1806	-7.6306
			Cluster-13677.245827	0.49529	0.34935	0.032388	-0.27255	-1.1772	-1.7936
			Cluster-13677.269063	4.9157	4.6574	2.6556	1.6662	0.17215	-0.22945
			Cluster-13677.299874	-0.61082	-1.5362	-1.3993	-1.3213	-1.4764	-2.289
			Cluster-13677.299872	-0.074161	-1.0385	0.27725	-2.9033	-1.8514	-6.6367
			Cluster-13677.109205	1.8819	1.5529	1.708	0.98834	1.1211	-1.1678
			Cluster-13677.199780	-2.0689	-0.22608	-1.3762	1.224	1.1462	-0.15333
			Cluster-13677.367321	9.0804	6.7422	7.6988	2.0122	-0.38164	1.5047
K14506	JAR1	jasmonic acid-amino synthetase	Cluster-13677.185631	1.602	1.7442	1.7593	0.50934	0.827	0.88547
K14486	K14486, ARF	auxin response factor	Cluster-13677.184704	-2.0148	-2.3082	-1.5493	-1.8439	-1.928	-2.3652
			Cluster-13677.184707	-1.9146	-0.64817	-0.99991	-1.2577	-0.44552	-1.1398
			Cluster-13677.295450	2.4692	2.7845	3.0951	0.35385	1.3201	1.3675
			Cluster-39529.6	0.37406	0.3663	0.23046	-1.1192	-0.99213	-2.7152
			Cluster-13677.184713	-2.2369	-1.1972	-1.2047	-1.1073	-0.62096	-1.2933
			Cluster-13677.137518	1.0368	1.7034	1.6703	1.1096	0.57846	0.63468
			Cluster-13677.137512	1.576	1.9179	1.4958	0.42893	0.46482	0.38206
			Cluster-13677.184710	-2.6446	-1.7918	-1.7063	-1.5374	-1.1937	-1.6358
K13422	MYC2	transcription factor MYC2	Cluster-13677.235239	-1.2384	-0.90014	-1.8592	0.41266	-0.37417	-1.9701
			Cluster-13677.243697	-0.5084	-0.48509	-1.5574	0.805	-0.76253	-1.2772
			Cluster-13677.243696	-0.84035	-0.34853	-1.1303	0.5861	-0.0014306	-1.9621
			Cluster-13677.235237	-0.87885	-0.67378	-1.5506	0.78514	-0.21024	-2.1884
K14508	NPR1	regulatory protein NPR1	Cluster-13677.241291	-0.65793	-0.77319	-0.066608	7.1656	2.0328	7.5798
			Cluster-13677.241298	-2.8276	-2.8458	-3.2804	0.34871	0.86233	-0.71682
			Cluster-13677.244283	-3.1011	-3.4173	-3.7731	0.035816	2.7891	1.55
			Cluster-13677.246664	-3.2531	-4.2903	-4.2973	-1.6843	-0.018876	-1.4078
			Cluster-13677.251560	-1.9398	-1.5854	-1.8376	0.046303	1.9447	1.0713
K12126	PIF3	phytochrome-interacting factor 3	Cluster-13677.272240	1.2717	1.5576	1.5122	2.2469	2.7849	2.4352
K16189	PIF4	phytochrome-interacting factor 4	Cluster-13677.240507	1.6274	1.5134	1.2363	3.1149	3.1063	3.1597
			Cluster-13677.229541	-2.7634	2.1249	2.6205	3.1422	3.8601	3.8181
			Cluster-13677.279448	3.9525	3.9417	2.9401	3.0676	3.7427	2.9039
			Cluster-13677.272236	2.1263	2.6811	2.5778	2.8233	3.2782	2.9281
			Cluster-13677.206788	-0.15947	0.49112	1.1978	1.2768	1.5709	2.291
			Cluster-13677.206802	0.4336	1.032	1.7827	1.5967	1.1907	2.5206
			Cluster-13677.242414	1.6993	2.87	2.5468	0.057767	-0.73791	-0.87294
			Cluster-13677.229540	2.1697	2.3323	1.6038	3.0978	3.7034	3.4474
			Cluster-13677.229547	3.0459	2.4877	1.8242	3.9288	1.898	3.277
			Cluster-13677.244874	2.1577	1.2696	1.5673	5.0549	6.2338	5.4912
			Cluster-13677.229514	1.3288	1.1153	0.66839	2.6091	4.0342	3.5427
			Cluster-13677.218936	2.3096	2.0542	1.5984	2.9452	4.2771	4.5075
			Cluster-13677.229538	4.2176	4.5302	3.93	4.3901	5.2908	4.9301
			Cluster-13677.229536	0.81466	1.0827	0.13362	4.1877	4.595	4.343
			Cluster-13677.229535	1.9835	1.5139	1.4927	2.8423	4.8578	4.3489
K14497	PP2C	protein phosphatase 2C	Cluster-13677.283353	-2.5187	-1.7648	-4.0121	-0.83171	-0.97743	0.96679
			Cluster-13677.283357	-1.2965	-1.096	-3.2436	0.67169	0.030463	1.8618
			Cluster-13677.283354	-1.4703	-1.725	-4.074	-0.7377	-0.60962	1.1895
			Cluster-13677.283355	-2.1148	-1.4405	-4.4713	-0.82969	-0.9546	1.0825
			Cluster-13677.204522	-0.78012	-0.66195	-1.0005	-2.3625	-2.2191	-1.4917
			Cluster-13677.204523	-0.015347	-1.0939	-2.4754	-2.0959	-2.9327	-2.2962
			Cluster-13677.204524	-0.8674	-1.8032	-1.3512	-2.7417	-2.3693	-2.2961
			Cluster-13677.234864	-2.4057	-3.2764	-4.0641	-0.92414	-0.96091	0.46608
			Cluster-13677.387525	-0.50287	-0.84666	-1.1267	-1.8039	-0.45959	0.9205
			Cluster-13677.234970	-0.29336	0.23887	-5.2859	-6.271	-0.73495	-1.2491
			Cluster-13677.447207	-4.5668	-3.9234	-3.9748	-1.2745	-1.1374	1.02
			Cluster-13677.447205	-2.3139	-4.6694	-6.7015	1.2279	0.21686	1.5747
			Cluster-13677.447208	-2.6345	-2.4658	-6.8614	-0.96752	-0.5325	0.55347
			Cluster-13677.165498	-1.0462	-1.1843	-0.98301	-2.25	-0.83793	-0.4379
			Cluster-13677.207428	-1.199	-1.4167	-1.246	-2.036	-1.6355	-0.39172
			Cluster-13677.396379	-1.7157	-0.90452	-4.1804	1.4229	2.4429	2.7506
			Cluster-13677.396382	-1.6567	-2.7569	-1.9791	-1.7481	-0.18141	0.43159
			Cluster-13677.320660	-0.53456	0.21628	-0.27235	-1.9023	-1.0534	1.0137
			Cluster-13677.447204	-3.01	-3.55	-5.3419	-1.1572	-0.87922	0.93197
K13449	PR1	pathogenesis-related protein 1	Cluster-13677.428727	5.574	4.6339	7.5636	8.994	2.0328	5.4686
			Cluster-13677.370955	3.8153	3.5269	4.0123	6.5438	7.6019	6.8984
			Cluster-13677.29670	4.8571	2.9448	4.7661	6.5625	6.5973	6.3497
			Cluster-13677.29671	3.1983	1.1432	4.5308	7.7464	8.4459	9.4952
			Cluster-13677.90901	5.1335	5.8497	6.5254	2.7317	2.4695	2.8583
			Cluster-13677.47706	1.7069	0.61319	2.0037	7.8906	6.8117	6.4481
			Cluster-13677.428728	4.5859	4.5207	5.8359	5.2772	1.615	2.5717
			Cluster-13677.122495	1.4678	-0.078065	2.382	5.3616	4.3015	2.6709
			Cluster-13677.407263	-2.368	-0.75488	-2.2173	-0.60619	0.39168	1.1854
K14496	PYL	abscisic acid receptor PYR/PYL family	Cluster-13677.232702	1.0261	1.6693	2.8839	1.6249	3.057	3.3515
			Cluster-13677.185899	1.7886	2.9784	4.2229	1.7133	2.9694	3.6636
			Cluster-13677.37356	4.7867	6.3207	6.9025	2.963	2.9058	2.417
			Cluster-13677.37355	7.4956	9.3963	9.5051	5.7179	4.0235	4.6457
K14488	SAUR	SAUR family protein	Cluster-13677.55658	3.4687	1.847	2.0912	5.6022	4.352	1.1196
			Cluster-13677.205632	-1.5607	-0.5828	-2.2768	0.55653	-1.7622	-1.1761
			Cluster-13677.452328	5.7646	5.4253	6.7565	0.71966	5.5306	3.8192
			Cluster-13677.231263	-1.6749	-0.87753	-1.8349	-1.8696	0.44973	-3.8978
			Cluster-13677.273570	-0.27607	-0.54174	-0.18591	3.2289	0.19936	-0.56643
			Cluster-13677.452329	4.3406	4.7616	5.2618	1.0093	7.451	3.3854
			Cluster-13677.251188	-0.51737	-0.87991	-0.24854	2.9459	0.35252	-0.80595
			Cluster-41963.1	-1.3015	-1.7683	-2.664	-1.1342	-0.60273	-1.7095
			Cluster-13677.291816	-3.5969	-2.2629	-3.2663	-1.3507	-0.34776	-1.4945
			Cluster-13677.291818	-2.6223	-1.8402	-2.7135	0.47827	1.4556	1.9879
			Cluster-13677.55661	1.9229	0.68261	0.12855	8.7837	7.5128	6.3613
			Cluster-13677.396372	1.0404	-0.2961	-5.9549	-2.7554	-0.86609	-7.3359
			Cluster-13677.452330	4.1911	3.576	4.4912	1.4572	4.8867	3.0091
K14498	SNRK2	serine/threonine-protein kinase SRK2	Cluster-13677.45144	0.75026	1.1692	1.2897	2.814	4.1034	3.5084
			Cluster-13677.246871	-4.5206	-3.9917	-3.6025	2.9411	2.8643	2.2672
			Cluster-13677.246874	-1.893	-2.4926	-2.2641	-0.14557	0.4665	-1.1804
			Cluster-13677.246879	6.8467	6.9181	6.1919	-3.5581	-0.70613	-0.29866
			Cluster-13677.249419	-1.7167	-2.1441	-1.994	0.47244	0.051264	-0.039074
			Cluster-13677.273342	-0.6231	-1.0104	-1.5967	-2.3873	-1.8734	-2.5584
			Cluster-13677.102892	1.4447	1.5277	1.4612	2.7974	3.8402	3.6046
			Cluster-13677.282600	-1.1637	-1.8382	-1.7888	-0.83643	-1.0659	-0.67961
			Cluster-13677.273334	-0.17652	0.0048834	-0.57578	-1.8503	-1.3194	-2.7631
			Cluster-13677.355070	1.1674	1.2558	1.6839	-0.78045	-0.60495	0.66482
			Cluster-13677.246872	-3.5356	-4.027	-3.893	0.3771	1.3075	-0.64044
			Cluster-13677.282602	-2.0927	-3.7775	-3.5086	1.8212	-3.4151	1.3458
			Cluster-13677.223600	-1.5254	-1.116	-1.6864	0.12834	0.020333	-0.16677
			Cluster-13677.375056	-2.1346	-0.53175	-2.0925	4.6153	5.4754	5.0517
			Cluster-13677.375055	0.66961	0.49477	0.0068583	2.6215	3.8013	3.0198
			Cluster-13677.282591	-0.71184	-1.6466	-0.62678	-0.1478	-0.91927	-0.51716
K14504	TCH4	xyloglucan:xyloglucosyl transferase TCH4	Cluster-13677.240097	-3.8608	-2.1122	-3.6913	0.71365	-0.22753	-1.4228
			Cluster-13677.240098	-4.0225	-1.9338	-5.1866	-0.1933	-0.56633	-1.4281
K14431	TGA	transcription factor TGA	Cluster-13677.329965	1.6098	0.5986	2.6896	1.9836	2.048	2.7194
			Cluster-13677.330886	-1.1059	-0.79502	-1.3548	-7.3281	-0.34419	-3.0912
			Cluster-13677.195645	-2.2284	-2.6925	-2.048	-0.98907	-1.7656	-1.1802
			Cluster-13677.195642	-2.4122	-2.8567	-1.7003	0.41871	-0.27559	0.39461
			Cluster-13677.330884	0.84153	0.16239	2.1718	-1.7123	-5.9916	-6.1079
			Cluster-13677.363748	1.8904	0.96381	2.6108	2.4464	2.5079	1.996
			Cluster-13677.148672	-0.37397	-0.85912	-0.51592	-1.2943	-1.5042	-1.8254
			Cluster-13677.366599	6.7532	6.3778	8.0135	0.27318	0.39113	0.043702
			Cluster-13677.195637	-1.6205	-2.3785	-1.2955	-1.1508	-1.7968	-1.165
			Cluster-13677.158571	-7.8877	-0.65115	-1.9973	-7.5417	-0.052552	-7.452
