# Supplementary material for: Global Gene Responses of Resistant and Susceptible Sugarcane Cultivars to Acidovorax avenae subsp. avenae Identified Using Comparative Transcriptome Analysis
Source: Microorganisms. 2019 Dec 19;8(1):10. doi: 10.3390/microorganisms8010010 (PMC7022508; doi:10.3390/microorganisms8010010)
Supplement: Supplementary file 1 [file microorganisms-08-00010-s001.zip › Table S9-20191120.xlsx]

## Sheet: Sheet2
Table S9. RNA sequencing results for transcript levels (log2Fold Change) of differentially expressed genes (DEGs) in ROC22 and MT11-610 enriched in the KEGG plant-pathogen interaction pathway (ko04626).
Ko ID	Ko name	Ko description	Unigene ID	ROC22			MT11-610
				24 hpi	48 hpi	72hpi	24 hpi	48 hpi	72hpi
K02183	CALM	calmodulin	Cluster-13677.238729	-1.088	-1.1812	-0.34914	0.25055	-1.6751	-2.5493
			Cluster-13677.392525	-1.5827	-2.6807	-2.7174	-1.5288	-1.8262	-2.8435
			Cluster-13677.225741	-0.65841	-1.0336	-0.76595	2.033	1.3493	1.5252
			Cluster-13677.9064	-8.1703	-3.7368	-3.1945	1.2042	-2.1595	-3.2773
			Cluster-13677.168503	-0.21436	-0.79276	-1.7942	-0.28442	-0.66608	-0.92514
			Cluster-13677.259506	-4.1384	-2.6287	-2.122	2.0528	1.289	0.49314
			Cluster-13677.247287	-0.40801	0.21856	0.18488	0.75455	2.0296	1.8429
			Cluster-13677.137522	-1.2493	-2.0095	-3.0896	-1.5567	-1.4343	-3.3379
			Cluster-13677.137521	-1.9855	-4.792	-3.1255	-1.4091	-1.5489	-1.7665
			Cluster-13677.137520	-1.1317	-2.27	-2.0696	-1.1661	-1.6014	-2.1646
			Cluster-13677.228138	-1.7768	-0.84924	-0.36791	0.29708	-0.17725	0.06273
			Cluster-13677.168502	-0.5817	-1.8243	-2.9462	-0.30106	-0.63765	-0.73509
			Cluster-13677.251137	-2.5059	-1.7829	-0.080791	3.1416	3.9051	4.0478
			Cluster-13677.241603	-0.5983	-0.18427	-0.73277	0.32273	1.6444	0.9874
			Cluster-13677.9065	-6.2217	-5.9416	-4.656	0.77561	-2.5739	-0.087581
K13473	CEBIP	chitin elicitor-binding protein	Cluster-13677.194872	0.19414	0.30548	-0.024717	1.7808	2.3467	2.2688
K13429	CERK1	chitin elicitor receptor kinase 1	Cluster-13677.241756	-1.4389	-1.8218	-1.7576	0.25843	0.7837	-0.26281
			Cluster-13677.241757	-3.6596	-2.7553	-5.0773	6.9594	4.873	3.9381
			Cluster-13677.241758	-3.0614	-3.2636	-3.5306	1.7562	0.075964	-1.1759
			Cluster-13677.178775	8.6495	9.3779	8.7148	1.9963	0.7219	-1.0883
K13448	CML	calcium-binding protein CML	Cluster-13677.228994	-0.83209	1.106	-0.26035	1.9138	3.0649	1.3947
			Cluster-13677.229865	-2.1656	-0.37261	-1.4287	2.447	2.5512	0.70381
			Cluster-13677.4792	-3.1269	-3.936	-2.516	-1.7358	-0.40725	0.012913
			Cluster-13677.253149	-0.87304	1.5108	-1.0077	2.8178	3.5574	1.8728
			Cluster-13677.4790	-1.9833	-2.397	-3.1734	-2.5356	-0.69756	-0.79784
			Cluster-13677.210958	-1.5028	0.036075	-3.5854	0.068027	0.41938	-0.84764
			Cluster-13677.210959	-1.3411	0.11284	-3.132	-1.9185	0.35923	-3.2838
			Cluster-13677.229867	-2.7843	-0.95209	-1.6708	4.6841	3.6611	2.8293
			Cluster-13677.223563	-0.42443	0.52603	-0.24464	2.3401	3.8698	1.5133
			Cluster-13677.390493	-0.75526	0.78928	-0.72015	2.9414	1.0579	-0.88017
			Cluster-13677.236095	-1.0863	0.77974	-1.6748	2.1397	2.8374	0.8081
			Cluster-13677.236096	-1.3833	0.019369	-2.0943	3.9789	2.0901	1.8912
			Cluster-13677.236099	-1.4598	0.76539	-1.8465	1.8351	2.803	0.55679
			Cluster-13677.247410	-1.1834	-1.7699	-1.7837	0.62865	0.062581	-1.4956
			Cluster-13677.217228	-2.4459	-1.5177	-2.4547	0.8347	0.09093	-0.94529
			Cluster-13677.217227	-3.433	-2.6619	-3.9019	-0.92527	-1.6397	-2.4959
			Cluster-13677.117653	1.0588	0.51603	0.0080565	0.40668	-3.8457	-3.3233
			Cluster-13677.117657	0.057617	0.15413	-0.54082	2.7635	1.7464	1.3421
			Cluster-13677.117659	0.054786	-0.0039157	-0.62101	2.427	1.3103	0.47228
			Cluster-13677.232020	-1.421	0.4092	-2.018	2.7022	1.9357	1.0849
			Cluster-13677.231749	-1.1833	0.92664	-0.32121	1.8852	3.0952	1.5147
			Cluster-13677.236075	-1.5409	1.1397	-1.3208	3.2744	3.2814	1.8215
			Cluster-13677.236074	-0.63299	1.7528	-0.57839	3.5665	3.5158	1.5087
			Cluster-13677.222977	-1.9708	0.49774	-1.3531	2.1842	4.041	3.5629
			Cluster-13677.111775	-1.2367	-0.33798	-0.80918	5.082	5.8297	5.9152
			Cluster-13677.206078	-1.6578	-0.57879	-1.3582	0.99749	1.9836	1.1467
			Cluster-13677.232808	-2.716	-1.7446	-2.8658	0.041727	-0.44587	-1.6205
			Cluster-13677.340215	-2.4643	-1.2504	-3.2367	-4.3182	-2.2048	-4.6684
			Cluster-13677.236103	-1.4247	0.23706	-0.66111	1.108	2.1777	1.2556
			Cluster-13677.236102	-2.0287	-0.1503	-1.3091	-6.3768	0.73223	-3.756
			Cluster-13677.236101	-0.77643	1.2551	-0.69696	6.0192	5.3388	2.7937
			Cluster-13677.168703	-2.3596	-0.14522	-1.3761	1.7807	-0.058091	0.036243
			Cluster-13677.231776	-1.5258	0.43149	-0.84618	1.2426	2.4003	0.86202
			Cluster-13677.227002	-0.79821	-0.16166	-1.4101	1.748	0.37935	-0.99065
			Cluster-13677.168708	-3.4832	-1.5578	-4.0344	0.49854	-1.5423	-1.9645
			Cluster-13677.168705	-2.4297	-0.26938	-1.7232	0.86098	-0.70478	1.0025
			Cluster-13677.231753	-0.5209	0.96955	0.82272	2.067	3.3331	3.1289
			Cluster-13677.168706	-1.879	-0.16517	-1.8554	1.3476	0.17342	-0.28964
K05391	CNGF	cyclic nucleotide gated channel, other eukaryote	Cluster-13677.126612	-1.3343	-1.5715	-1.204	-0.42487	-0.61143	-0.53554
			Cluster-13677.126610	-1.1866	-1.6439	-1.3608	-0.81281	-0.23548	-0.3333
			Cluster-13677.304587	-1.1412	-3.0673	-1.878	-0.55287	-2.0936	-2.2395
			Cluster-13677.352995	7.0461	3.923	6.0093	-5.0429	0.4713	-1.6145
			Cluster-13677.227090	-1.4538	-1.9379	-2.0681	-1.5696	-1.3722	-1.8271
			Cluster-13677.315155	-1.3082	-1.9649	-2.2088	-0.83076	-0.20323	-0.51422
			Cluster-13677.216100	-1.0482	-1.3711	-1.5251	-0.97495	-0.04126	-0.44845
			Cluster-13677.235882	2.7037	1.6059	3.2893	6.4393	6.552	5.2211
			Cluster-13677.231981	-0.50829	1.0237	-0.94155	-2.3688	-5.471	-5.5883
			Cluster-13677.277790	-1.1582	-0.89031	-0.10368	0.53026	1.6063	2.0076
			Cluster-13677.246015	-2.4908	-3.0695	-2.4342	-0.82805	0.45305	-0.56426
K13412	CPK	calcium-dependent protein kinase	Cluster-13677.230086	-5.0212	-3.019	-8.9782	-1.0672	0.82269	-2.7597
			Cluster-13677.242010	-5.3531	-3.4001	-4.716	-2.2301	-1.3167	-2.0777
			Cluster-13677.217094	-4.7312	-3.2244	-5.5937	3.6313	1.9182	-0.080181
			Cluster-13677.230073	-4.4643	-2.3066	-4.0387	3.0077	-0.67816	-1.7647
			Cluster-13677.213839	0.71392	-0.54314	0.99384	0.75212	1.8264	1.8973
			Cluster-13677.230075	-3.985	-3.086	-7.1882	4.8493	4.1441	3.9275
			Cluster-13677.257228	-2.5242	-0.8832	-2.6575	0.83342	-0.88213	-1.0459
			Cluster-13677.257209	-2.5948	-2.0042	-3.1075	0.53986	0.01231	-1.9771
			Cluster-13677.257208	-1.8631	-2.3491	-2.2836	-0.1311	0.4388	-0.48424
			Cluster-13677.230977	-2.2455	-0.57919	-2.6501	0.30654	-0.27392	-1.3983
			Cluster-13677.308430	0.97411	1.3609	0.57648	2.2567	1.4054	1.5116
			Cluster-13677.216328	-1.7349	-1.0024	-0.4611	-0.046084	1.1069	0.75949
			Cluster-13677.286572	-0.41326	-0.86472	-0.73329	-1.0821	-1.5398	-2.136
			Cluster-13677.231374	-2.1087	-1.5104	-2.1401	-0.097875	0.22406	0.13749
			Cluster-13677.412605	2.8667	2.9086	1.385	-7.9132	-1.2562	-7.8233
			Cluster-13677.261143	-2.8826	-2.2564	-3.279	-0.39066	0.94462	-1.0484
			Cluster-13677.235453	-2.8191	-1.9282	-4.3564	2.7854	-0.73149	-3.0483
			Cluster-13677.237258	-4.2622	-3.2036	-4.5903	-5.6416	0.76464	-5.5492
			Cluster-13677.237259	-3.411	-2.3347	-2.7454	-0.2153	0.59902	0.5106
			Cluster-13677.237257	-3.0606	-4.1502	-4.2246	0.11711	1.3557	1.2335
			Cluster-13677.213804	1.8657	1.4227	0.92433	1.1588	2.8144	2.4637
			Cluster-13677.227262	-3.6607	-4.8	-5.9203	4.2427	1.6214	2.6652
			Cluster-13677.162849	-8.6143	-8.3366	-1.2986	-2.1674	-2.0056	-1.5195
			Cluster-13677.160626	0.77916	-1.4214	0.25964	2.1824	2.4265	2.7018
			Cluster-13677.224639	-7.1756	-3.1855	-4.2602	0.91036	3.5298	-1.7573
			Cluster-13677.231378	-2.5264	-2.0924	-2.8648	-0.49786	-0.13514	-0.4108
			Cluster-13677.418480	-0.89038	-1.5846	-2.5254	8.6311	8.6191	8.7747
			Cluster-13677.213836	-2.1661	-1.2237	-2.405	1.6522	1.41	0.53618
			Cluster-13677.206716	-1.808	-1.0287	-1.7313	1.0452	0.26919	-0.24636
			Cluster-13677.230074	-3.9107	-3.0874	-3.9719	0.45286	1.1037	0.21252
			Cluster-13677.250537	0.47413	1.4582	-0.51286	6.077	4.8054	2.5478
			Cluster-13677.230091	-2.0916	-3.8665	-4.9323	2.1392	-0.2093	0.34865
			Cluster-13677.237272	-2.9431	-1.9782	-3.6135	0.32528	1.1548	0.75261
			Cluster-13677.237277	-3.0927	-2.593	-3.0209	-0.40901	1.4337	0.51373
			Cluster-13677.237275	-2.3531	-2.1982	-1.7416	-2.669	1.2479	-0.23862
			Cluster-13677.237264	-4.4936	-2.911	-4.2076	0.68022	2.6377	1.1323
			Cluster-13677.237263	-3.7038	-2.1731	-4.0482	-0.57119	0.86198	-0.42161
			Cluster-13677.237262	-3.9584	-4.0387	-7.6817	-0.091514	0.78536	-2.7597
			Cluster-13677.228789	-5.4013	-1.8163	-4.2907	3.6918	1.4808	-0.064776
			Cluster-13677.237268	-4.2675	-2.5768	-4.149	0.93591	0.96339	1.4245
			Cluster-13677.391859	1.4328	0.55467	2.0602	1.6648	1.5824	1.9533
			Cluster-13677.290852	-2.3142	-1.7617	-0.82807	-1.1583	0.69744	0.15667
			Cluster-13677.230094	-3.6887	-2.8514	-3.4256	0.65199	2.0441	-0.181
			Cluster-13677.230076	-8.3283	-2.5012	-10.719	2.8761	-3.9298	0.11393
			Cluster-13677.243403	-2.8855	-1.349	-3.0536	0.95167	-1.3349	-1.7946
			Cluster-13677.144490	-1.084	-1.546	-0.97987	0.45393	0.66169	0.34104
			Cluster-13677.230082	-7.103	-4.8076	-7.8661	-0.019736	1.4393	-1.5513
			Cluster-13677.257220	-2.1758	-1.6984	-2.9403	1.3874	1.5611	-0.35974
			Cluster-13677.101415	-6.2831	-4.2345	-2.6073	-0.18434	-2.7318	-2.3195
			Cluster-13677.213852	-1.6943	-0.75541	-1.7255	5.9393	4.5448	1.6197
			Cluster-13677.182607	-0.076297	-0.67922	-0.67854	0.29424	2.0989	1.5416
			Cluster-13677.231376	-3.1161	-1.3291	-2.6054	1.1079	0.17119	-1.2219
			Cluster-13677.278964	-6.629	-1.6115	-0.2098	-0.57962	-1.6207	-1.2096
			Cluster-13677.257218	-2.144	-1.4568	-4.7248	2.0897	1.9552	-0.51973
			Cluster-13677.257219	-1.8861	-1.8112	-1.8284	-0.46551	0.47248	-0.5612
			Cluster-13677.213841	-0.71774	0.041532	-0.21908	1.3236	1.7487	1.492
			Cluster-13677.213840	0.65267	0.40935	0.41353	0.44292	2.1966	1.8635
K13420	FLS2	LRR receptor-like serine/threonine-protein kinase FLS2	Cluster-13677.66330	5.2888	6.0316	5.5832	7.5162	6.4676	4.5921
			Cluster-13677.66331	1.9607	3.2921	2.6055	3.4886	4.6704	4.8364
			Cluster-13677.240428	-0.59321	-1.0532	0.010004	1.4166	1.101	2.9426
			Cluster-13677.356911	1.7608	1.4691	0.73151	1.3092	0.10865	0.72904
			Cluster-13677.199189	-0.43884	-1.7351	-1.52	0.019158	-1.263	-1.4883
K04079	htpG, HSP90A	molecular chaperone HtpG	Cluster-13677.100655	2.8036	2.454	0.79528	3.7723	3.2885	5.1324
			Cluster-13677.237573	1.1695	1.2967	2.0044	2.3234	2.736	3.6488
			Cluster-13677.265039	1.7951	1.7816	2.6684	2.658	2.8954	4.1448
			Cluster-13677.237577	0.6728	0.55854	1.3133	2.0369	2.3925	3.2434
			Cluster-13677.237587	1.2625	1.1039	1.5858	1.0317	1.0701	1.7137
			Cluster-13677.238468	1.3735	1.3383	1.8884	1.029	0.86588	1.6211
			Cluster-13677.238469	2.0867	1.8644	2.5804	0.84592	1.3199	2.1973
			Cluster-13677.238466	0.87894	0.68629	1.4554	1.1236	1.1369	1.5019
			Cluster-13677.238464	0.17633	-0.44962	0.26899	1.4873	1.0722	1.6164
			Cluster-13677.238465	0.70906	0.41939	1.0945	1.1411	1.058	1.7606
			Cluster-13677.238475	-0.0057115	-0.61936	0.099071	1.3222	1.1553	2.0241
			Cluster-13677.238473	1.3171	1.0662	1.7127	1.2738	1.2032	1.9776
			Cluster-13677.339652	1.3772	1.1769	0.50865	3.1273	2.9536	4.4615
			Cluster-13677.238480	0.46791	0.49675	1.4752	2.015	2.7389	3.4384
K04368	MAP2K1, MEK1	mitogen-activated protein kinase kinase 1	Cluster-13677.315108	-0.90867	-0.41525	-0.75048	-7.8622	-0.43683	-1.7762
			Cluster-13677.164186	7.4916	9.3798	21.63	-2.7958	0.48382	1.7981
K13414	MEKK1P	mitogen-activated protein kinase kinase kinase 1, plant	Cluster-13677.258044	-1.2568	-1.1603	-1.6063	-0.014706	0.0018341	-0.18134
			Cluster-13677.289576	0.39278	1.3774	2.2831	-0.60804	0.78617	0.57477
			Cluster-13677.166560	2.7373	3.4655	3.0667	-0.070185	0.12638	0.2606
			Cluster-13677.288546	5.4182	6.6975	5.5695	-1.3255	-1.5158	-1.8402
			Cluster-13677.288521	-1.0283	-0.53787	-0.55587	-1.4461	-2.0448	-2.3172
			Cluster-13677.288523	-1.5143	-1.243	-1.1743	-2.283	-1.3158	-2.6261
K13413	MKK4_5P	mitogen-activated protein kinase kinase 4/5, plant	Cluster-13677.215651	0.66967	0.82881	1.9876	-0.04561	0.56999	0.72729
			Cluster-13677.215641	-1.6898	-1.3021	-1.9284	-0.188	0.2131	0.9603
K13430	PBS1	serine/threonine-protein kinase PBS1	Cluster-13677.136317	-0.57957	-0.25495	-0.41148	-6.0794	-0.68347	-2.702
K13430	PBS1	serine/threonine-protein kinase PBS1	Cluster-13677.335879	-0.8655	-2.6353	-1.9057	-2.6933	-1.7372	-2.0758
K13449	PR1	pathogenesis-related protein 1	Cluster-13677.122495	1.4678	-0.078065	2.382	5.3616	4.3015	2.6709
			Cluster-13677.370955	3.8153	3.5269	4.0123	6.5438	7.6019	6.8984
			Cluster-13677.29670	4.8571	2.9448	4.7661	6.5625	6.5973	6.3497
			Cluster-13677.29671	3.1983	1.1432	4.5308	7.7464	8.4459	9.4952
			Cluster-13677.90901	5.1335	5.8497	6.5254	2.7317	2.4695	2.8583
			Cluster-13677.47706	1.7069	0.61319	2.0037	7.8906	6.8117	6.4481
			Cluster-13677.428728	4.5859	4.5207	5.8359	5.2772	1.615	2.5717
			Cluster-13677.428727	5.574	4.6339	7.5636	8.994	2.0328	5.4686
			Cluster-13677.407263	-2.368	-0.75488	-2.2173	-0.60619	0.39168	1.1854
K13436	PTI1	pto-interacting protein 1	Cluster-13677.254196	-0.34032	0.46571	-4.3699	5.2129	3.7772	3.2617
			Cluster-13677.344850	0.69207	0.77447	1.0891	4.8841	5.5679	4.3833
			Cluster-13677.322073	0.58003	3.0945	2.2722	0.75791	2.5598	1.2001
			Cluster-13677.220024	-2.1793	-0.74952	-1.0353	-2.9817	-0.46361	-3.2042
			Cluster-13677.220011	-2.58	-0.49963	-8.2798	1.3179	0.61622	-0.84748
			Cluster-13677.220004	-2.3889	-0.4695	-1.3617	1.0152	-0.13879	-0.61558
			Cluster-13677.41490	-1.6797	-1.6397	-1.5288	0.057371	0.80471	0.62698
			Cluster-13677.344845	-0.92582	-1.9117	-1.547	-6.8215	-0.65923	-2.1621
			Cluster-13677.318767	-2.9008	-0.86581	-3.4674	1.0989	0.91784	-0.78401
			Cluster-13677.322069	0.099598	-0.35222	-0.18895	0.75792	1.8984	1.5454
			Cluster-13677.220042	-1.8859	-0.6511	-0.73875	0.098561	-0.11451	-0.59358
			Cluster-13677.232495	-2.5648	-0.99965	-0.7012	-0.60117	0.37131	-2.0914
			Cluster-13677.268805	-1.229	-0.31536	-1.8546	-7.9575	-7.7335	-7.8666
			Cluster-13677.215878	-0.62542	-1.154	-1.543	-1.0817	-6.3819	-2.5525
K13447	RBOH	respiratory burst oxidase	Cluster-13677.87268	0.62386	0.57452	-1.6856	-1.2458	-2.6638	-2.2071
			Cluster-13677.326457	2.0442	-0.2037	-1.1442	-0.13989	-1.132	-1.5276
			Cluster-13677.202152	0.37243	0.48814	-0.48024	-0.47247	-0.69673	-5.7724
			Cluster-13677.298142	-1.4428	-1.9347	-2.7036	-1.556	-1.7065	-2.3951
			Cluster-13677.228748	-0.25241	-0.19109	-1.0737	-1.5032	-2.1483	-2.3054
			Cluster-13677.201635	-2.3913	-0.71735	-1.3188	0.036463	1.5224	0.99154
			Cluster-13677.211063	-3.2945	-6.275	-6.5095	-0.64516	-0.35986	-6.055
			Cluster-13677.211062	-2.4454	-3.1549	-3.9094	-2.3362	-2.6019	-3.3038
			Cluster-13677.211069	-1.9648	-2.6021	-3.1913	-2.2414	-2.7278	-2.6413
			Cluster-13677.326460	0.23005	-2.6163	-2.1036	-2.4728	-2.643	-5.8659
			Cluster-13677.235547	0.035726	-0.37919	-2.6975	-4.6824	-3.7525	-3.887
			Cluster-13677.241657	-2.1478	-1.393	-2.1192	-0.65741	0.58656	-0.85911
			Cluster-13677.238343	-2.3494	-0.90136	-1.9509	0.52268	0.60162	0.38846
			Cluster-13677.235415	-2.5134	-1.5396	-2.2825	-0.21117	0.47359	-0.057515
			Cluster-13677.228793	-0.54719	0.84409	-5.3832	-3.45	-3.9511	-8.2288
			Cluster-13677.134834	-1.9848	-2.3069	-2.9839	-1.7166	-2.5996	-2.5733
			Cluster-13677.211070	-2.0155	-3.1176	-3.2629	-2.4175	-2.649	-3.0359
			Cluster-13677.227006	-0.47547	-0.93501	-1.1641	-1.1964	-1.8522	-1.9394
K13456	RIN4	RPM1-interacting protein 4	Cluster-13677.261932	-1.9283	-1.4092	-1.9438	-0.12487	0.42044	-0.55639
			Cluster-13677.211221	-3.7167	-1.0159	-2.4041	2.6474	2.8675	-0.085254
			Cluster-13677.211223	-3.6037	-1.097	-2.2677	1.16	2.0798	1.6916
			Cluster-13677.211222	-3.0671	-1.5939	-2.2956	0.53505	1.2413	0.59032
K13457	RPM1, RPS3	disease resistance protein RPM1	Cluster-13677.387120	2.011	2.7403	2.4741	-6.8162	0.22227	-1.0307
			Cluster-13677.250870	-1.9138	-1.2613	-1.3489	-0.024651	-0.15776	-0.65325
			Cluster-13677.98295	-1.0666	-1.8753	-2.068	-1.002	-1.0596	-1.2609
			Cluster-13677.447122	7.172	6.3156	7.1746	2.2122	1.2775	1.8825
			Cluster-13677.369301	2.366	2.9491	1.4087	-0.064641	1.2793	1.637
			Cluster-13677.250863	-2.2833	-1.5175	-1.5764	-1.4681	-1.164	-1.9085
			Cluster-13677.345882	0.22908	0.18374	-1.0878	-6.1897	-0.49138	-2.3166
			Cluster-13677.408108	2.5157	3.2193	4.0677	-0.91428	5.0598	2.975
			Cluster-13677.274135	4.357	5.9529	5.1349	-1.2961	-0.52791	-0.56988
K13459	RPS2	disease resistance protein RPS2	Cluster-13677.176017	-1.3416	-0.57472	-2.5365	0.9289	0.24235	-1.3851
			Cluster-13677.74269	-0.13818	0.018727	-0.18099	1.7377	1.4036	1.2123
			Cluster-13677.331136	-1.3623	-0.71285	-2.0807	2.739	0.2713	0.18334
			Cluster-13677.331137	-1.5651	-0.98798	-2.8318	-0.11152	0.87003	-6.6911
			Cluster-13677.109116	3.8144	3.2544	3.3451	1.4188	2.2439	0.73613
			Cluster-13677.313589	-0.86924	-0.30448	-1.9896	-0.046917	1.223	-0.31002
K18835	WRKY2	WRKY transcription factor 2	Cluster-13677.72159	2.6229	2.029	1.9596	0.46326	-0.18781	0.59526
			Cluster-13677.72162	3.4794	2.621	2.5757	1.241	0.98694	-0.61832
K13425	WRKY22	WRKY transcription factor 22	Cluster-13677.376691	-1.7325	-2.5436	-6.7112	-1.8556	2.4159	-0.7556
K13424	WRKY33	WRKY transcription factor 33	Cluster-13677.234689	-2.4186	-3.4434	-3.6793	-0.04125	0.79764	-1.7876
			Cluster-13677.243728	-2.4854	-1.1125	-2.8411	1.9154	0.81629	-0.73091
			Cluster-13677.115664	-1.9926	-0.85561	-1.7485	1.3698	1.1481	0.2855
			Cluster-13677.115665	-2.599	-1.0141	-2.1956	1.187	0.38592	0.30532
			Cluster-13677.115666	-2.0587	-1.0971	-2.3184	2.6312	1.5943	1.4272
			Cluster-13677.234696	-0.96358	-1.5289	-1.7698	0.48356	-1.0836	-1.6656
			Cluster-13677.243732	-2.2255	-0.24894	-2.0329	2.4231	1.1707	0.027621
			Cluster-13677.234710	-0.65131	-0.79145	-1.8701	1.2101	0.3405	-0.64239
			Cluster-13677.224536	-1.2422	-0.95327	-2.1079	1.5667	0.24187	-0.51823
			Cluster-13677.295356	0.4972	0.85285	1.6769	0.65267	2.0489	1.2762
			Cluster-13677.243733	-0.41349	-0.29383	-0.80696	2.801	1.3562	-0.43611
			Cluster-13677.228754	-2.1331	-1.2628	-2.3068	1.7588	0.39632	0.33651
			Cluster-13677.243729	-2.1506	-1.5719	-2.913	2.137	0.746	-0.91097
			Cluster-13677.243727	-2.0811	-0.81104	-2.3775	2.0615	0.85287	-0.78614
			Cluster-13677.317254	0.73599	0.87585	1.8384	-0.031981	2.284	1.676
